# Supplementary material for: Synthesis, crystal structure, and properties of methyl-substituted coronene amide analogue
Source: Royal Society of Chemistry journal article supplement (doi:10.1039/d2ra04035b), 2022-01-01

## Supplementary Information

### Synthesis, crystal structure, and properties of methyl-substituted coronene amide analogue

Kenta Rakumitsu,<sup>a</sup> Miho Fujii,<sup>a</sup> Sotaro Kusumoto,<sup>b</sup> Shoko Kikkawa,<sup>c</sup> Isao Azumaya,<sup>c</sup> Akihiro Yokoyama\*<sup>a</sup>

<sup>a</sup> Faculty of Science and Technology, Seikei University, 3-3-1 Kichijoji-kitamachi, Musashino, Tokyo 180-8633, Japan

<sup>b</sup> Department of Material and Life Chemistry, Faculty of Engineering, Kanagawa University, 3-27-1 Rokkakubashi, Kanagawa-ku, Yokohama 221-8686, Japan

<sup>c</sup> Faculty of Pharmaceutical Sciences, Toho University, 2-2-1 Miyama, Funabashi, Chiba 274-8510, Japan

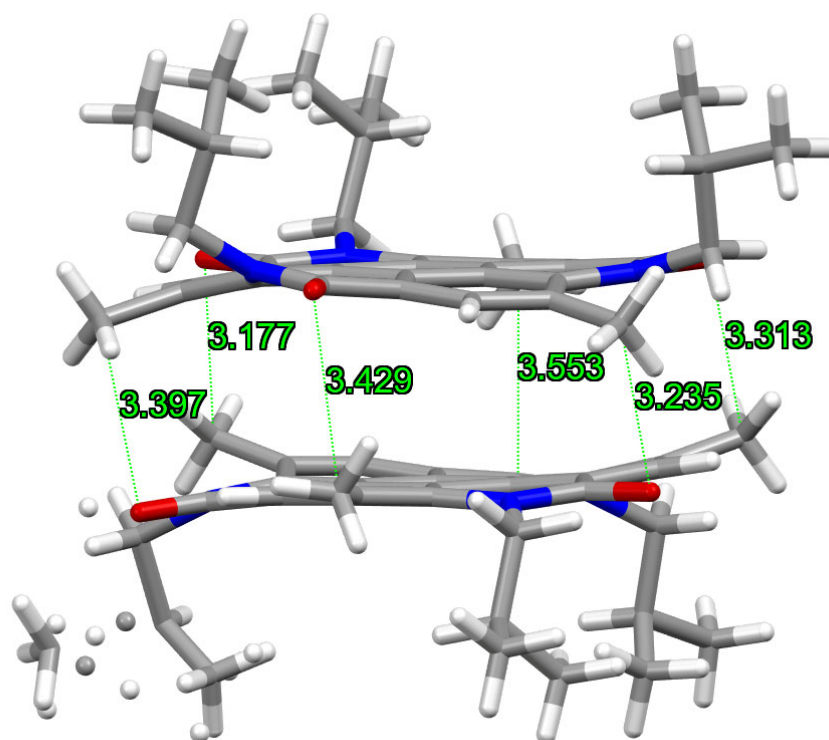

**Fig. S1.** Multiple CH<sub>3</sub>...O contacts (with distance (Å) between C and O) in the stacking molecules.

---

\*Corresponding author.  
E-mail address: ayokoyama@st.seikei.ac.jp (A. Yokoyama)

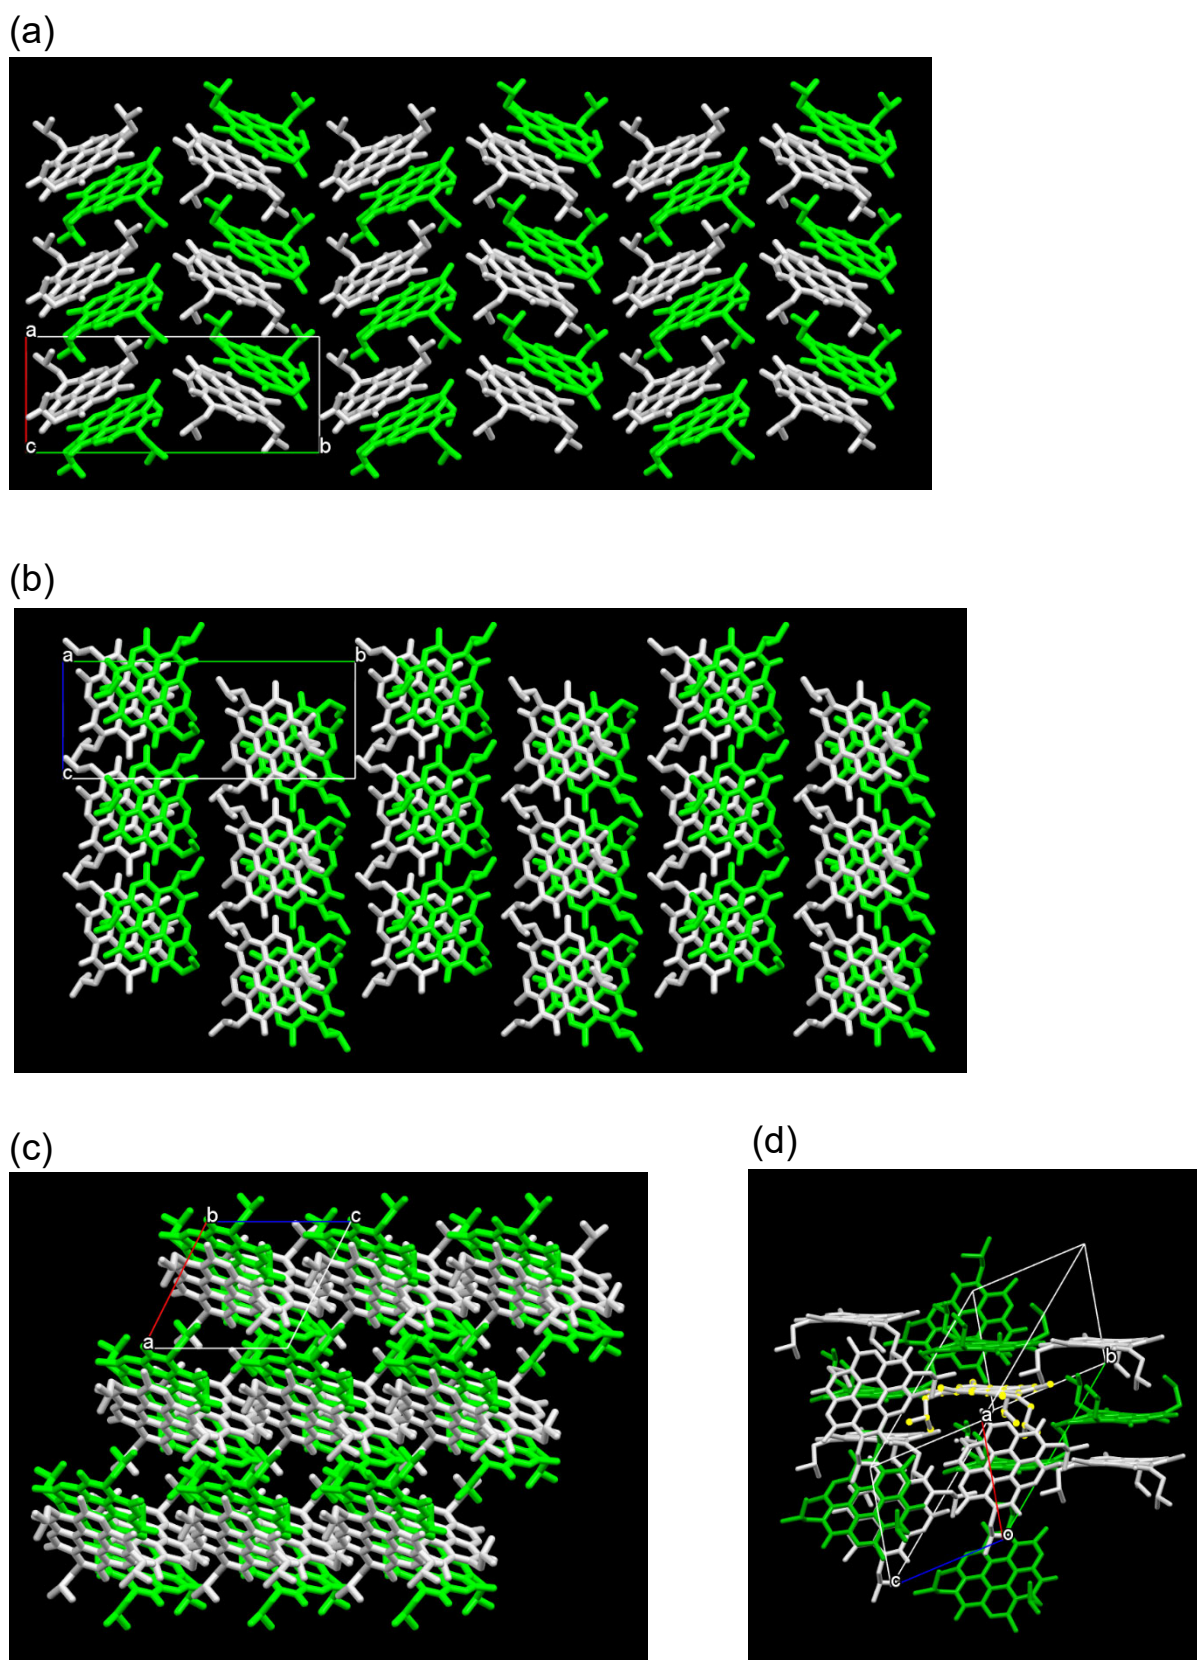

**Fig. S2.** Packing structure of **3** with symmetry operation viewed down (a) *c*-axis, (b) *b*-axis, and (c) *a*-axis. (d) Packing structure around one of **3** (the same direction as Fig. S3).

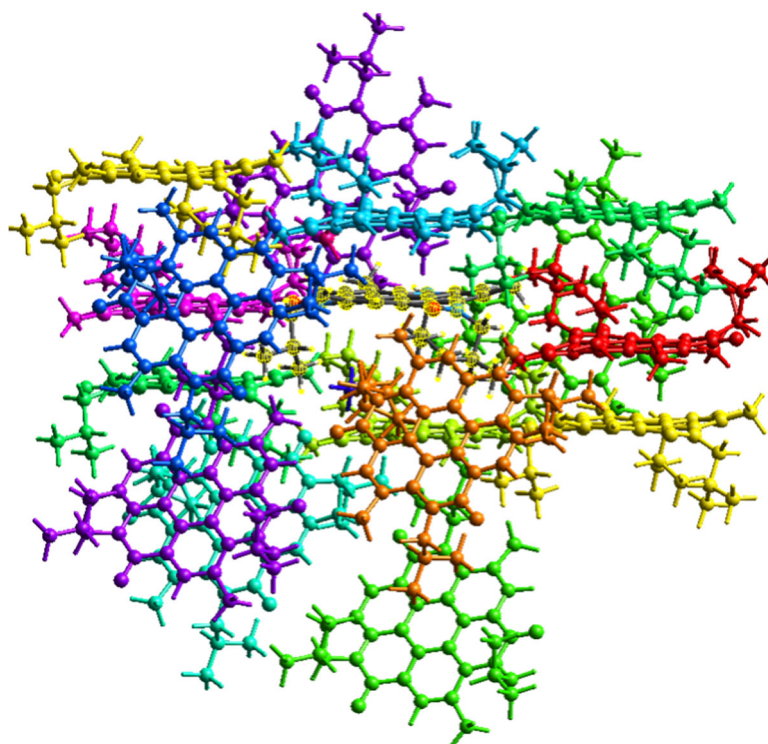

Crystal Atoms Surface **Energies**

Interaction Energies (kJ/mol)

R is the distance between molecular centroids (mean atomic position) in Å.

Total energies, only reported for two benchmarked energy models, are the sum of the four energy components, scaled appropriately (see the scale factor table below)

|  | N | Symop         | R     | Electron Density | E_ele | E_pol | E_dis  | E_rep | E_tot  |
|--|---|---------------|-------|------------------|-------|-------|--------|-------|--------|
|  | 1 | -             | 10.40 | HF/3-21G         | -29.0 | -15.4 | -63.2  | 36.9  | -66.5  |
|  | 1 | -             | 10.58 | HF/3-21G         | -10.4 | -8.0  | -63.3  | 33.7  | -45.5  |
|  | 2 | x, y, z       | 11.94 | HF/3-21G         | -0.4  | -0.7  | -17.1  | 8.6   | -9.3   |
|  | 1 | -             | 8.29  | HF/3-21G         | -9.5  | -6.0  | -90.3  | 41.5  | -61.3  |
|  | 2 | -x, y+1/2, -z | 15.42 | HF/3-21G         | 0.1   | -0.0  | -2.8   | 0.1   | -2.4   |
|  | 2 | x, y, z       | 11.45 | HF/3-21G         | -4.4  | -2.2  | -23.3  | 10.7  | -18.3  |
|  | 1 | -             | 12.28 | HF/3-21G         | -4.9  | -3.7  | -16.5  | 8.5   | -15.3  |
|  | 1 | -             | 4.93  | HF/3-21G         | -38.2 | -12.0 | -200.4 | 96.2  | -149.3 |
|  | 1 | -             | 12.66 | HF/3-21G         | 0.2   | -1.0  | -15.1  | 7.3   | -8.2   |
|  | 1 | -             | 5.62  | HF/3-21G         | 0.0   | nan   | 0.0    | 0.0   | nan    |
|  | 2 | -x, y+1/2, -z | 14.37 | HF/3-21G         | 0.0   | -0.5  | 0.0    | 0.0   | -0.3   |
|  | 1 | -             | 11.47 | HF/3-21G         | -25.3 | -13.6 | -34.0  | 35.4  | -36.6  |
|  | 1 | -             | 9.14  | HF/3-21G         | 0.3   | -0.5  | -13.8  | 6.0   | -7.6   |

← stacking pair

Scale factors for benchmarked energy models  
See Mackenzie et al. IUCrJ (2017)

| Energy Model                                     | k_ele | k_pol | k_disp | k_rep |
|--------------------------------------------------|-------|-------|--------|-------|
| CE-HF ... HF/3-21G electron densities            | 1.019 | 0.651 | 0.901  | 0.811 |
| CE-B3LYP ... B3LYP/6-31G(d,p) electron densities | 1.057 | 0.740 | 0.871  | 0.618 |

**Fig. S3.** The interaction energies of various pairwise molecules estimated using CE-HF/3-21G in CrystalExplorer 17.5.<sup>1</sup> Total interaction energy includes electrostatic, polarization, dispersion, and exchange-repulsion terms. The viewing direction is the same as in Fig S2d.

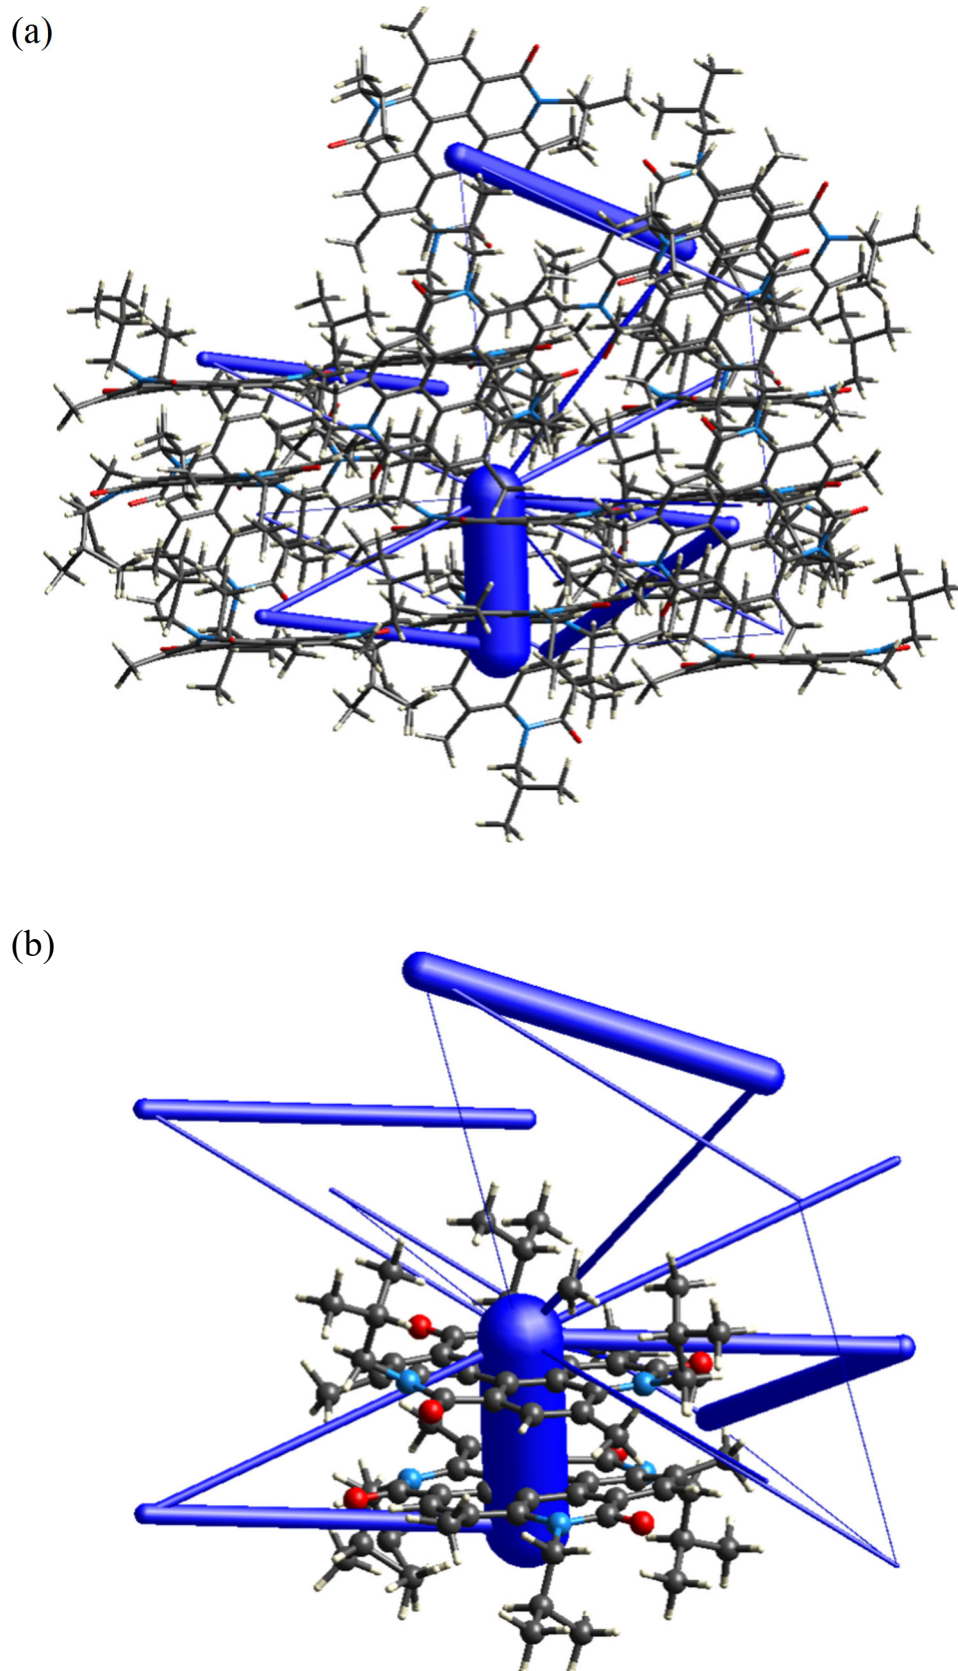

**Fig. S4.** Energy frameworks of **3** in (a) total interaction strengths and (b) extracted dimers. Energy frameworks were constructed from pairwise intermolecular interaction energy calculations (at crystal geometry).

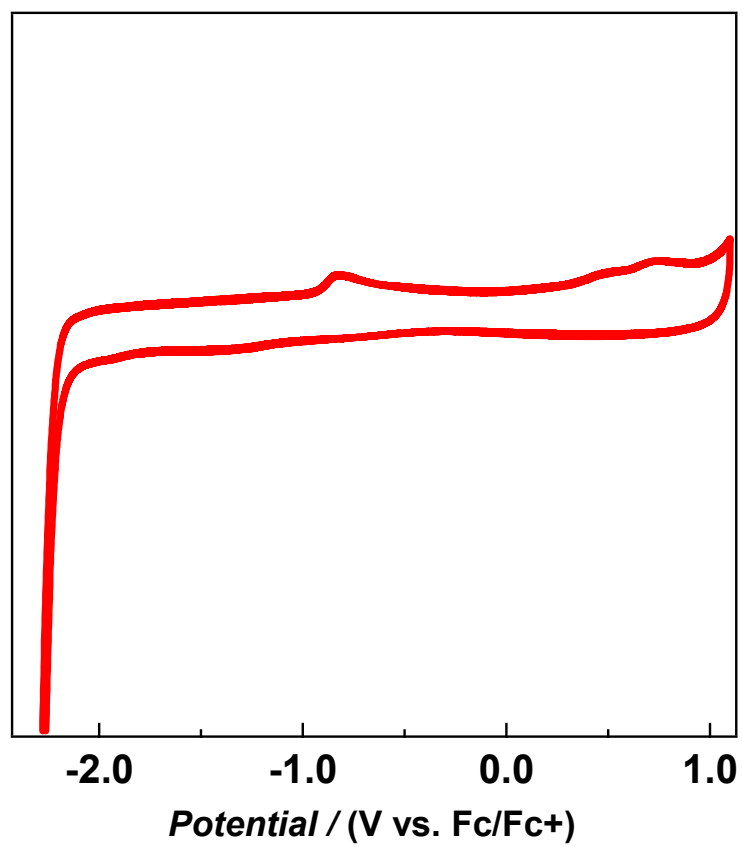

**Fig. S5.** Cyclic voltammogram of **3** measured in CH<sub>2</sub>Cl<sub>2</sub> (0.1 M *n*-Bu<sub>4</sub>NPF<sub>6</sub>) at a scan rate of 0.1 V/s.

**Table S1.** Crystallographic data and refinement parameters for **3**.

One of isobutyl groups showed positional disorder. Two possible positions having different orientations were assumed with 50%/50% probabilities for C37A, C39A and C37B, C39B, respectively.

|                                         |                                                               |
|-----------------------------------------|---------------------------------------------------------------|
| Formula                                 | C <sub>36</sub> H <sub>39</sub> N <sub>3</sub> O <sub>3</sub> |
| $M_r$                                   | 561.72                                                        |
| Crystal system                          | Monoclinic                                                    |
| Space group                             | $P2_1$                                                        |
| $a / \text{\AA}$                        | 11.26590(10)                                                  |
| $b / \text{\AA}$                        | 25.57580(10)                                                  |
| $c / \text{\AA}$                        | 11.44520(10)                                                  |
| $\alpha / \text{deg}$                   | 90                                                            |
| $\beta / \text{deg}$                    | 116.5650(10)                                                  |
| $\gamma / \text{deg}$                   | 90                                                            |
| $V / \text{\AA}^3$                      | 2949.60(5)                                                    |
| $Z$                                     | 4                                                             |
| $Z'$                                    | 2                                                             |
| Temperature / $K$                       | 93                                                            |
| Goodness-of-fit on $F^2$                | 1.041                                                         |
| $R_1 [I > 2\sigma(I)]$ on $F$           | 0.0383                                                        |
| $wR_2$ (all data) on $F^2$              | 0.1035                                                        |
| Reflection collected (all data)         | 39543                                                         |
| No. of reflections [ $I > 2\sigma(I)$ ] | 10048                                                         |
| $R_{\text{int}}$                        | 0.0225                                                        |
| Abs. corr.                              | multi-scan                                                    |
| Flack parameter                         | 0.55(3)                                                       |
| Radiation type                          | CuK $\alpha$ ( $\lambda = 1.54187 \text{\AA}$ )               |
| $T_{\text{max}}$                        | 0.838                                                         |
| $T_{\text{min}}$                        | 0.981                                                         |
| $2\theta_{\text{max}}$                  | 68.228                                                        |
| $\mu / \text{mm}^{-1}$                  | 0.637                                                         |
| CCDC No.                                | 2130884                                                       |

## References

- 1 Spackman, P. R.; Turner, M. J.; McKinnon, J. J.; Wolff, S. K.; Grimwood, D. J.; Jayatilaka, D.; Spackman, M. A. *J. Appl. Cryst.* **2021**, *3*, 1006–1011.

$^1\text{H}$  NMR of **9** ( $\text{CDCl}_3$ , 500 MHz)

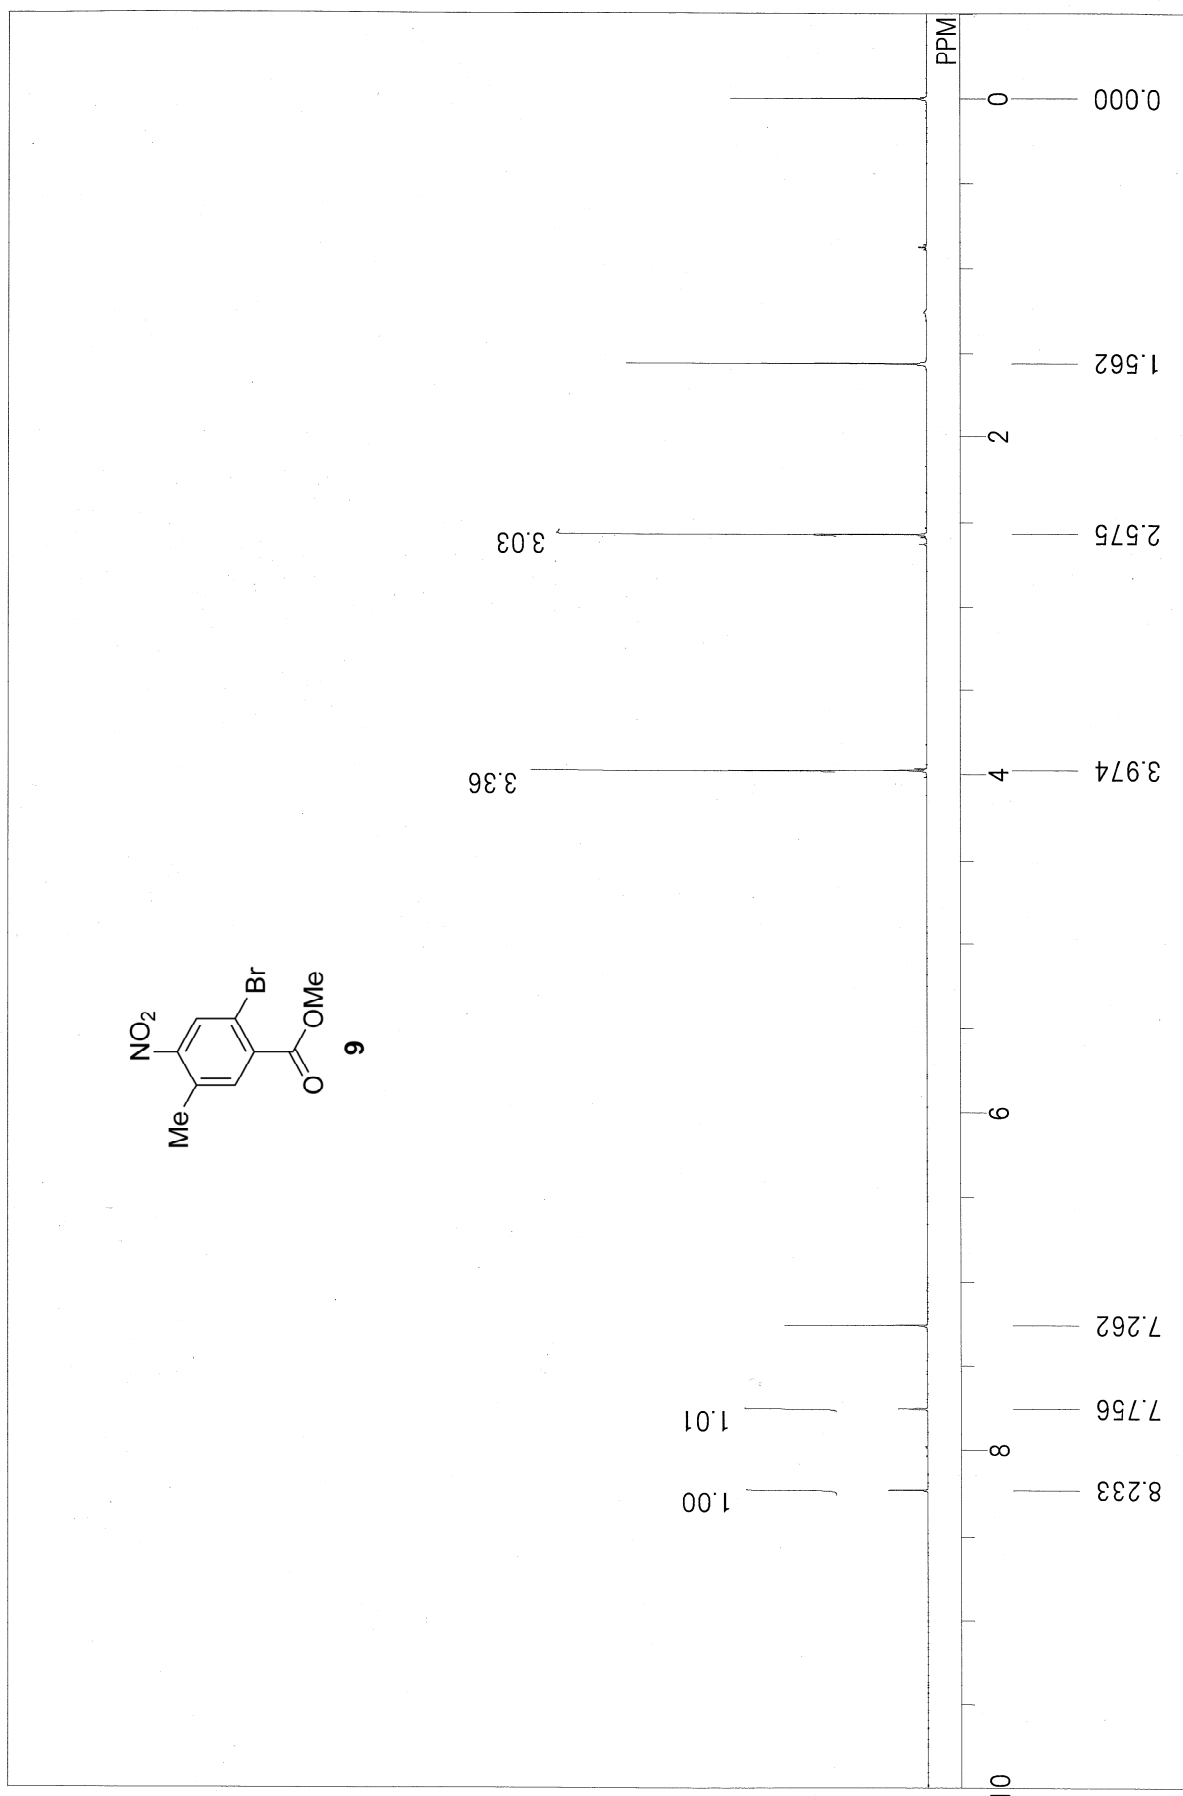

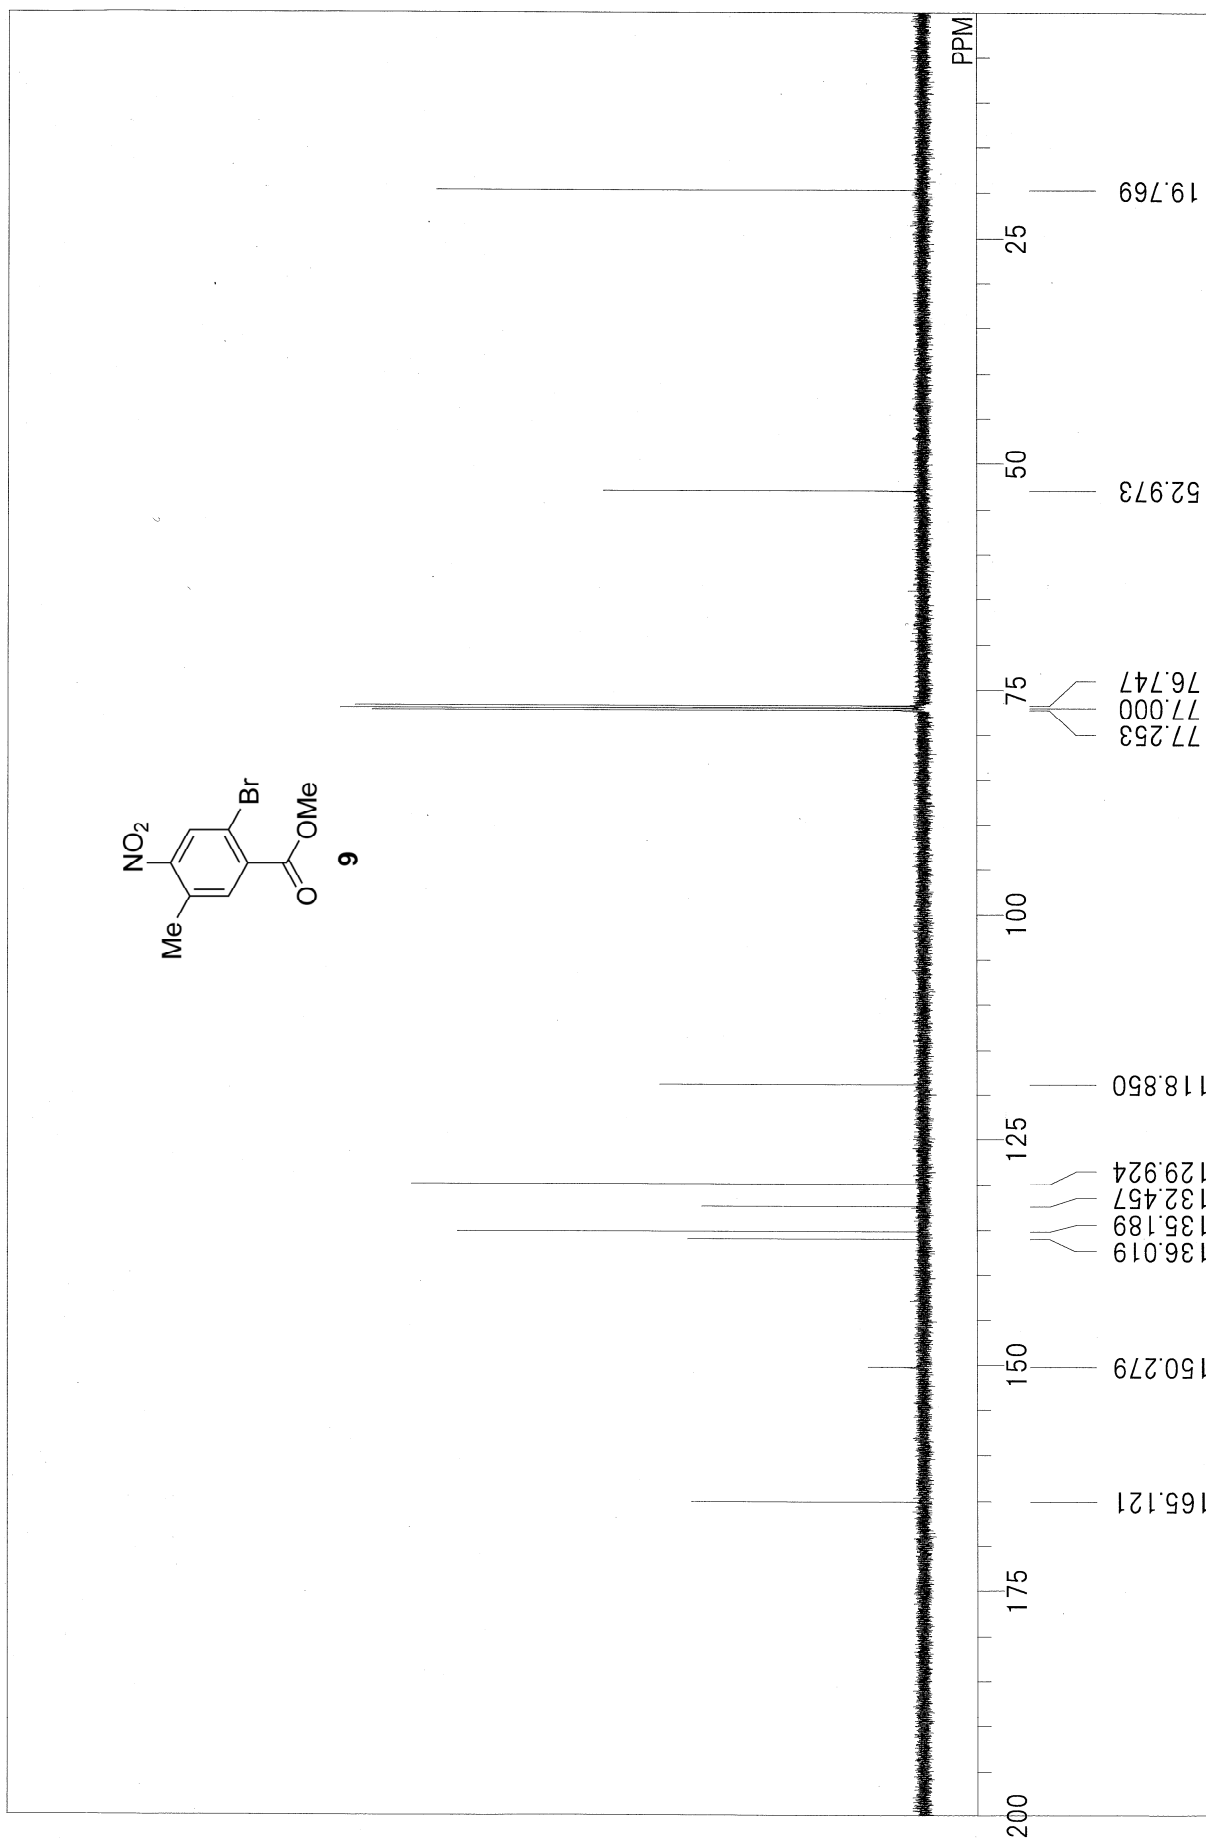



$^1\text{H}$  NMR of **10** ( $\text{CDCl}_3$ , 500 MHz)

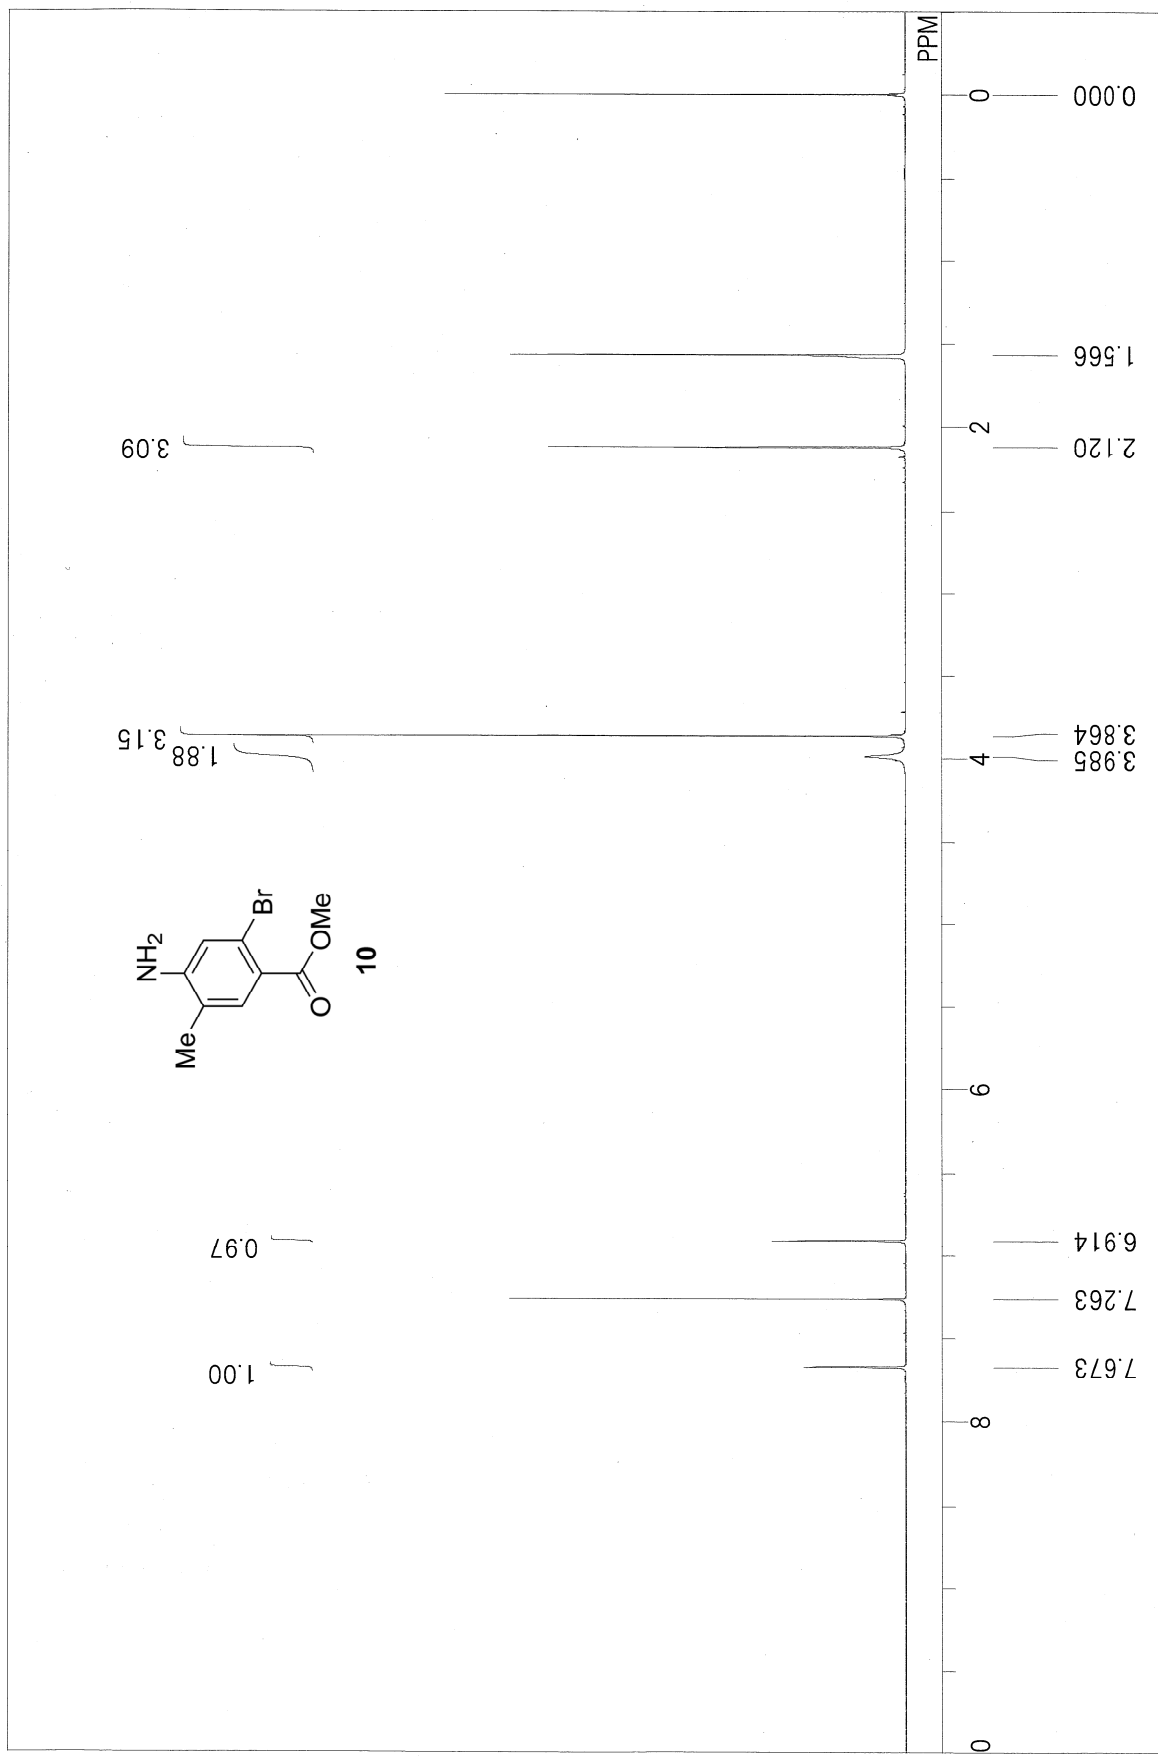

<sup>13</sup>C NMR of **10** (CDCl<sub>3</sub>, 126 MHz)

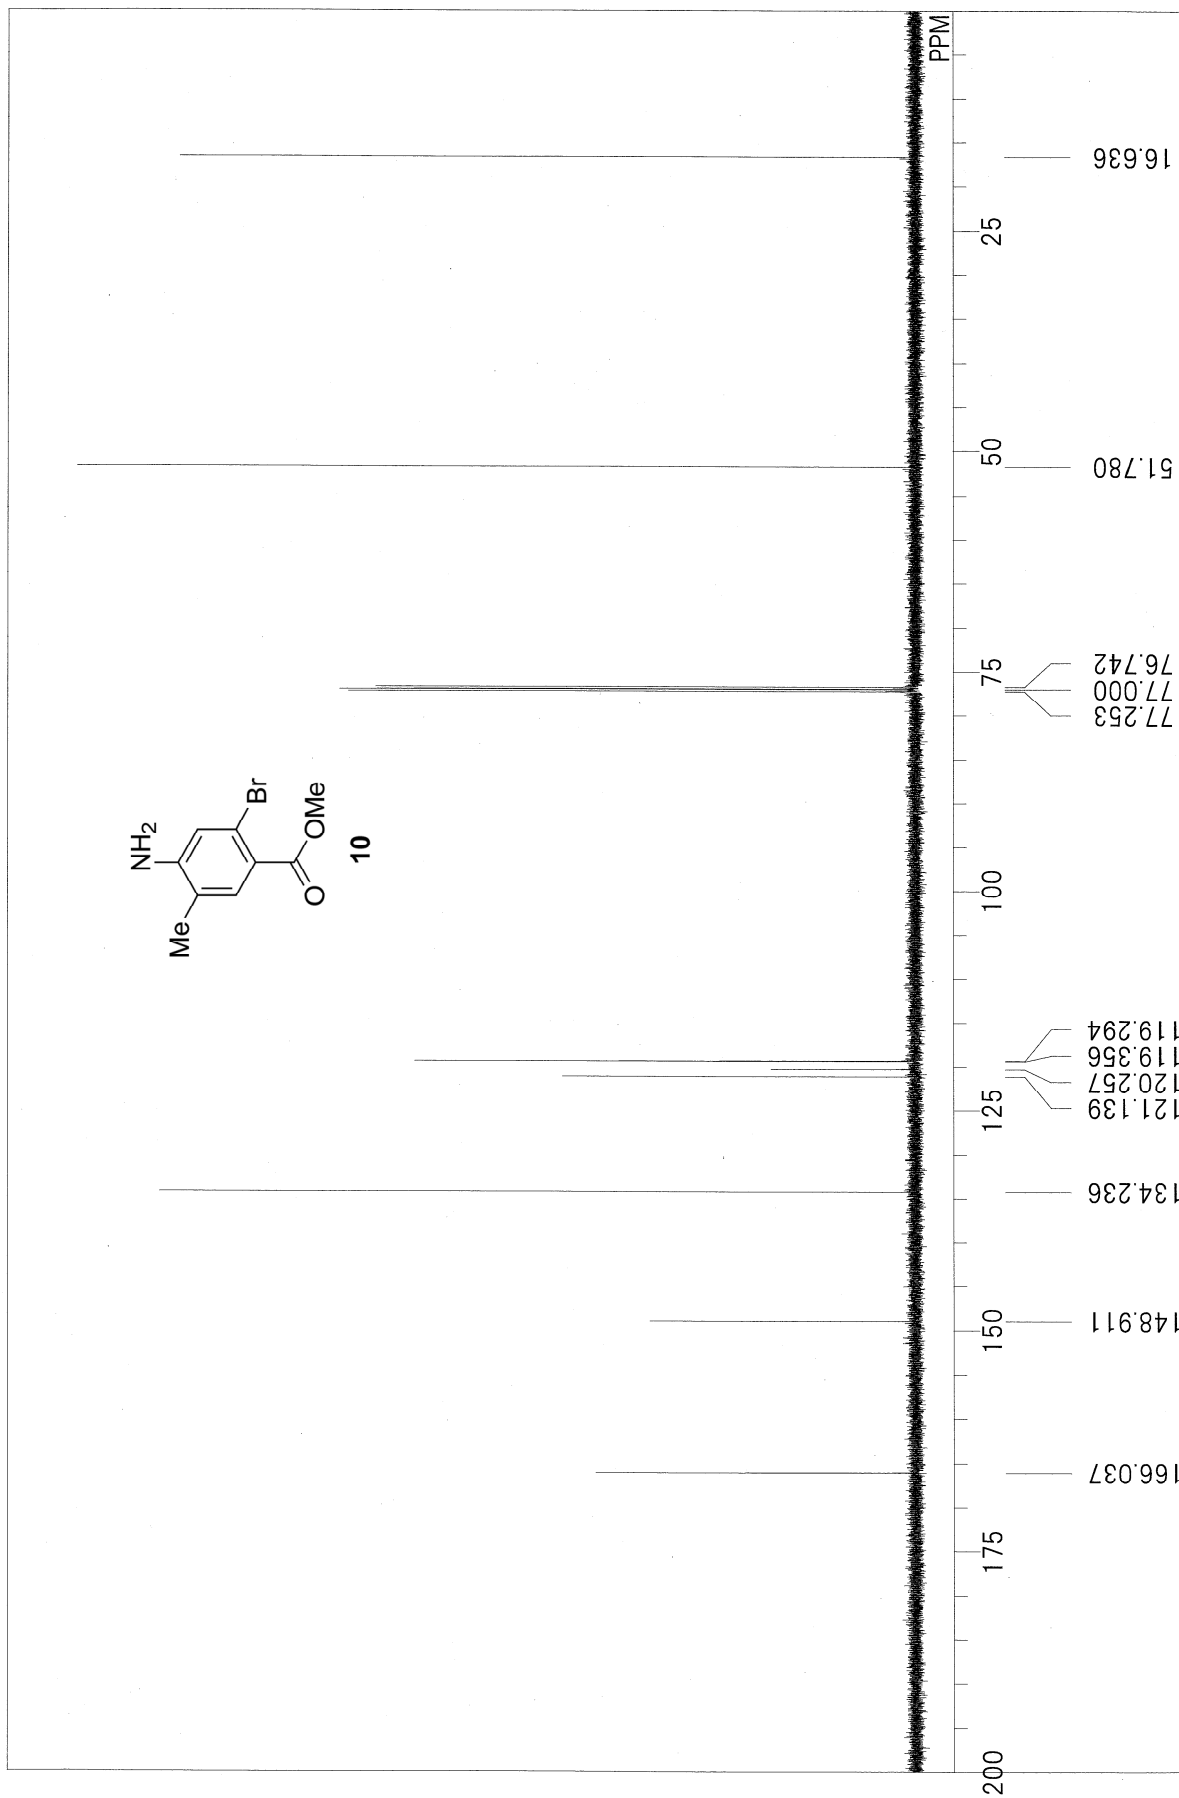

<sup>1</sup>H NMR of **11** (CDCl<sub>3</sub>, 500 MHz)

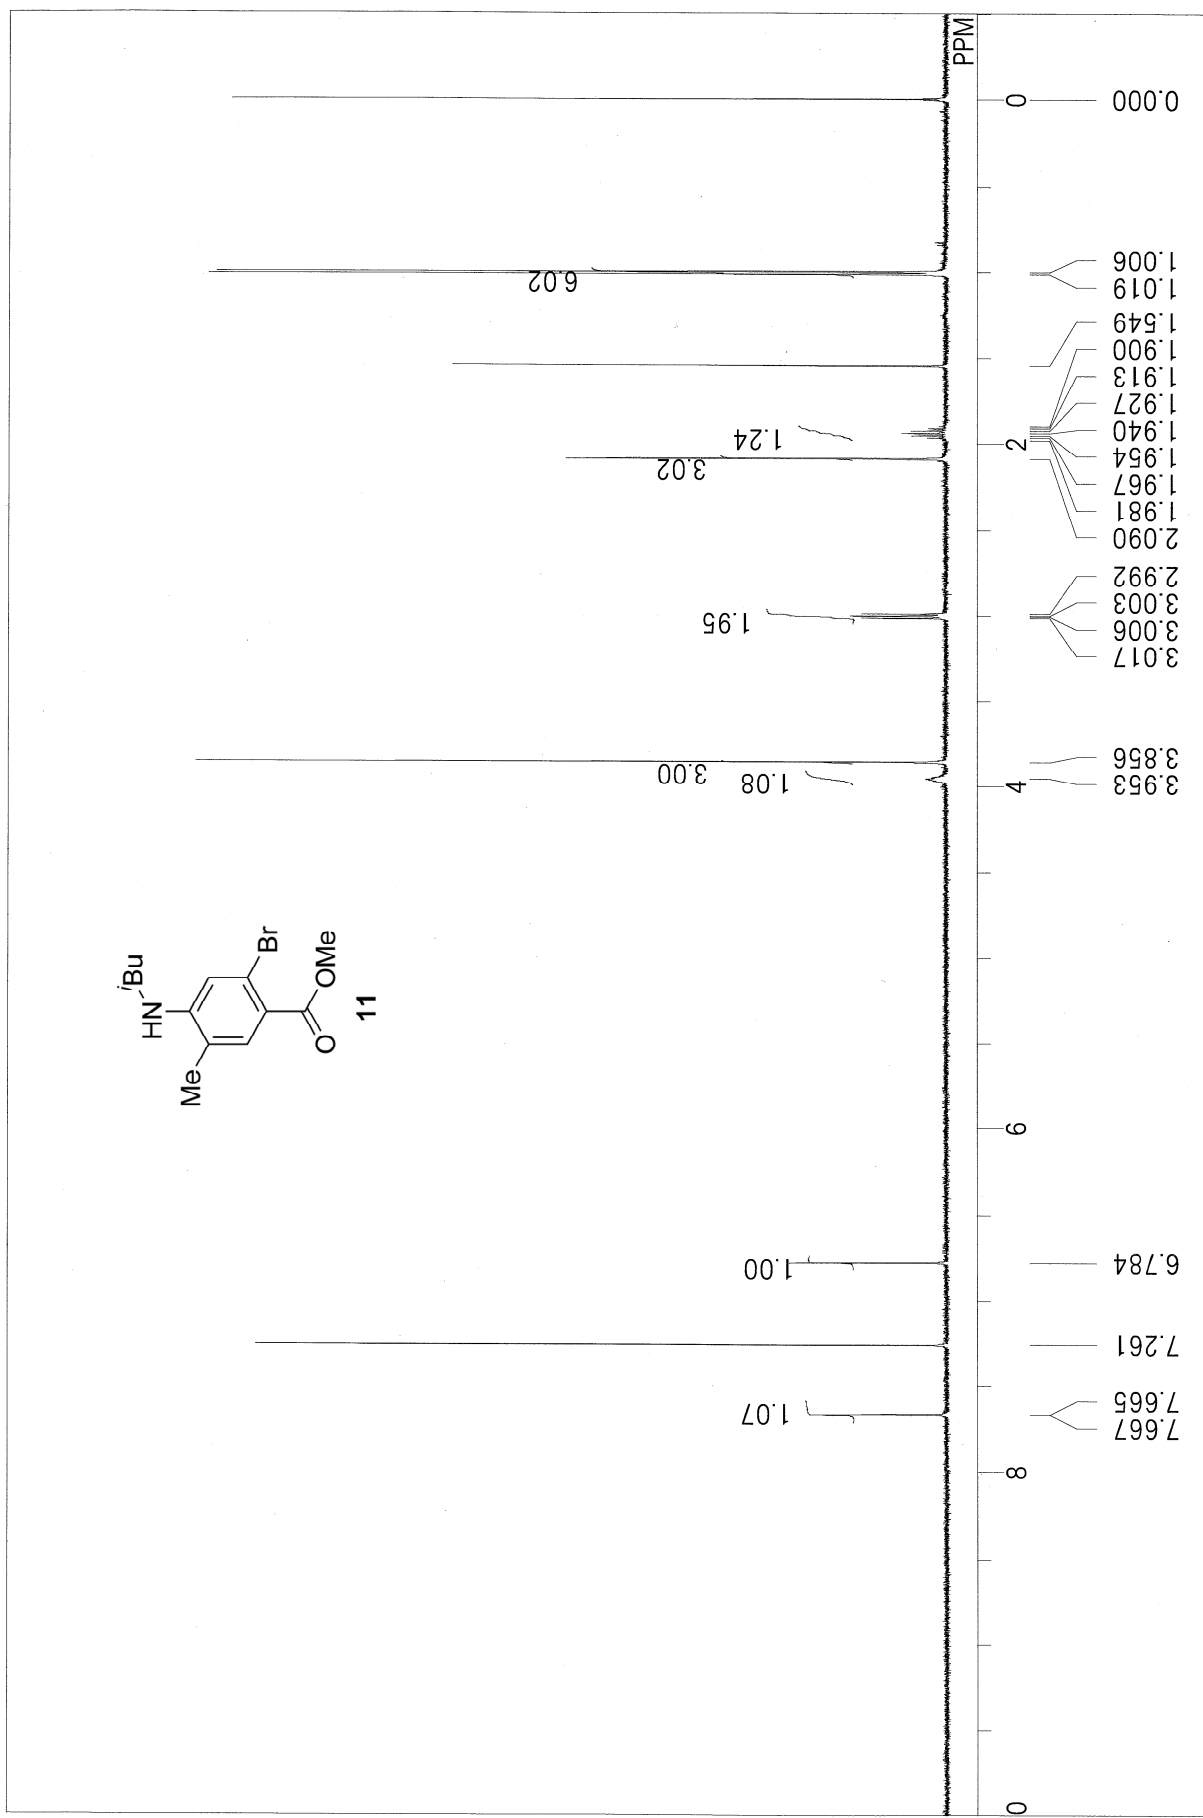

$^{13}\text{C}$  NMR of **11** ( $\text{CDCl}_3$ , 126 MHz)

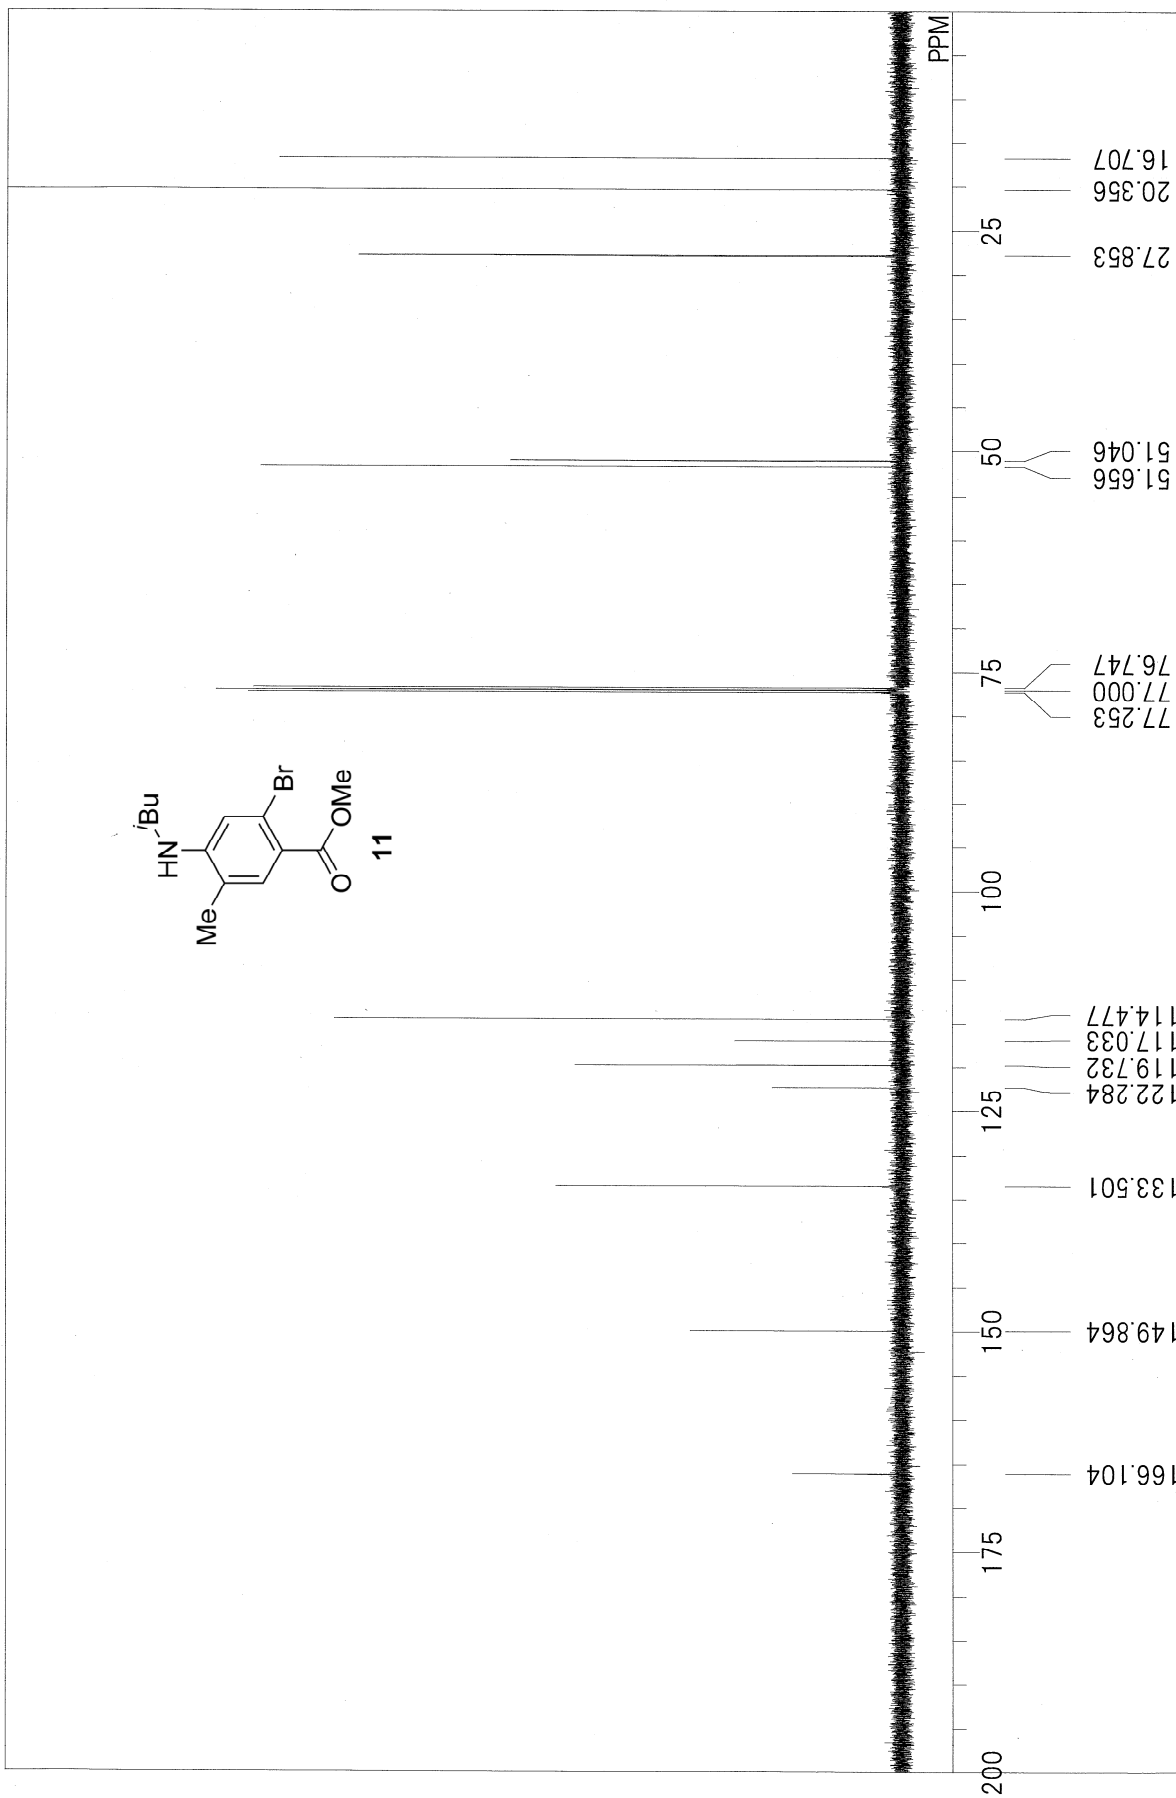

$^1\text{H}$  NMR of **12** ( $\text{CDCl}_3$ , 500 MHz)

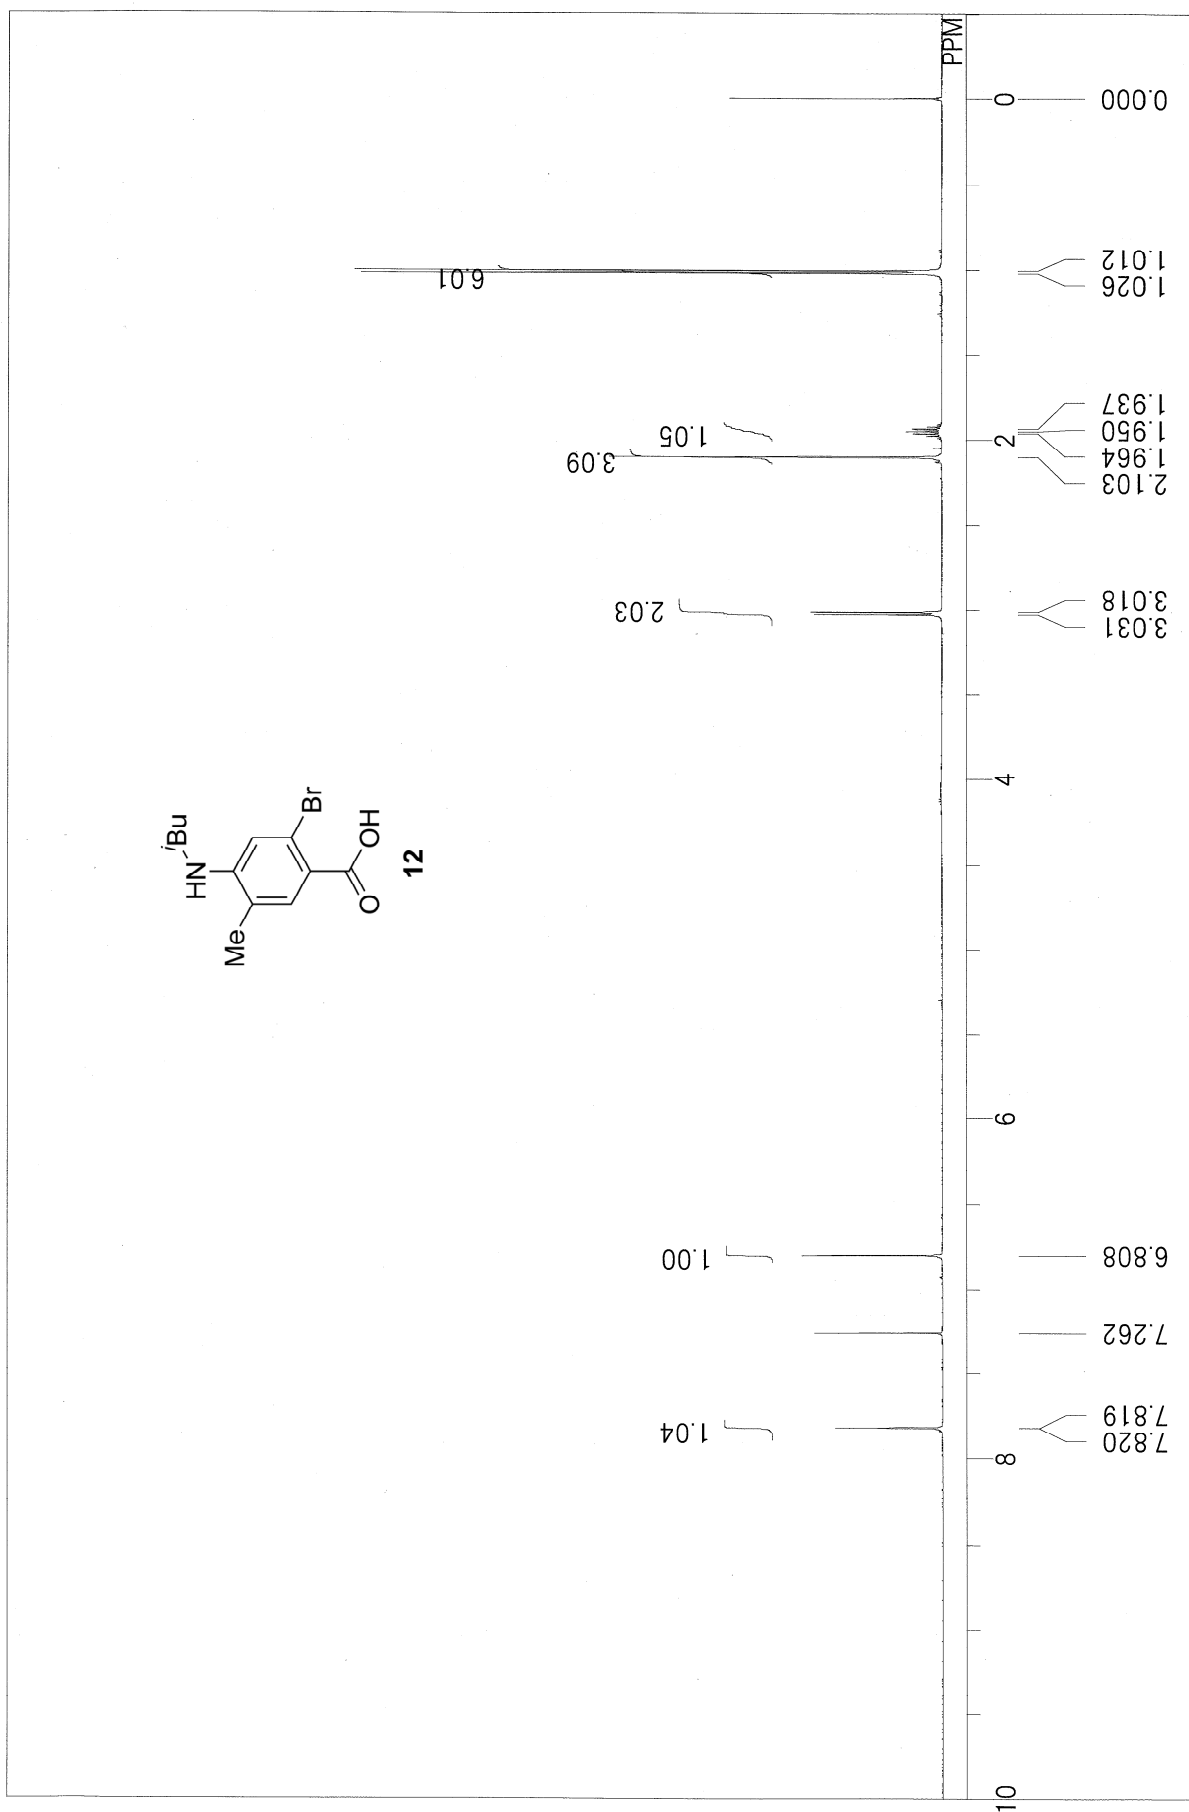

$^{13}\text{C}$  NMR of **12** ( $\text{CDCl}_3$ , 126 MHz)

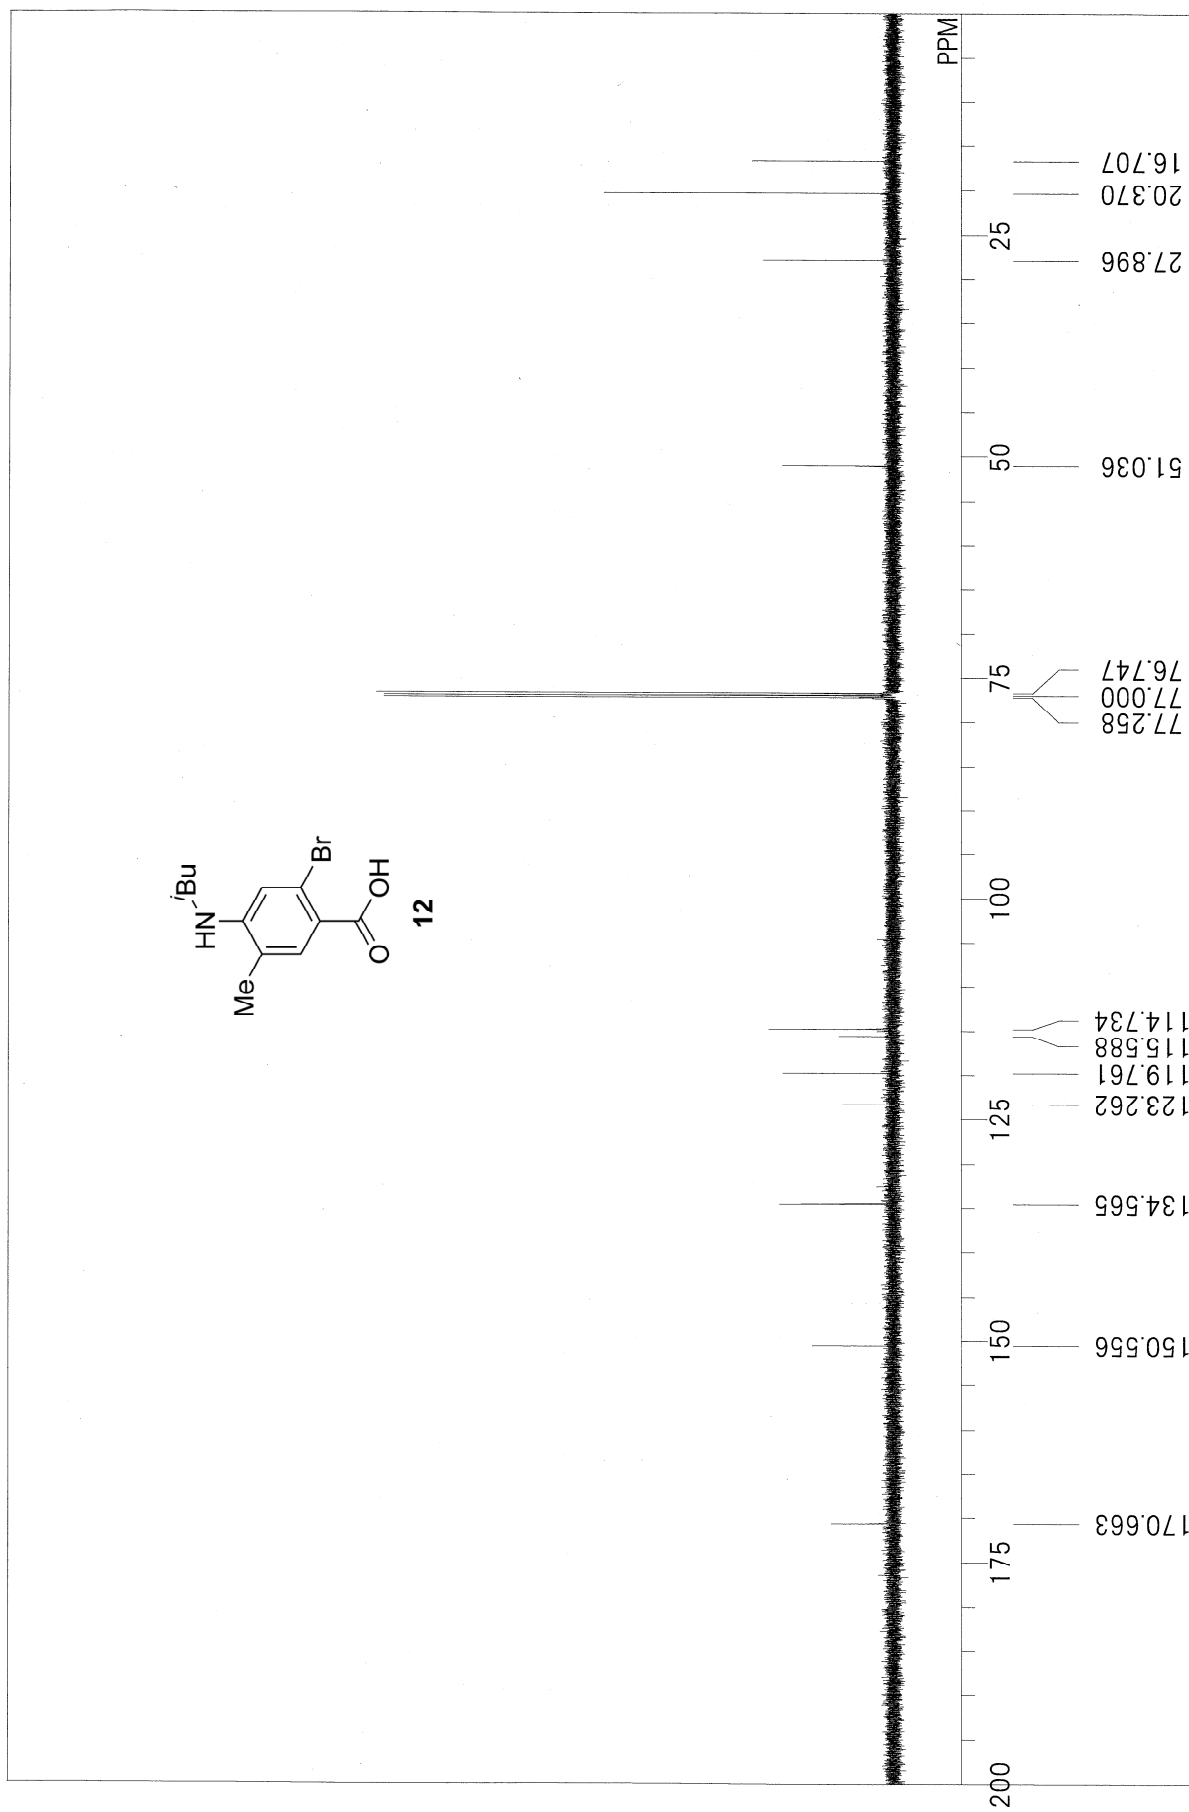

$^1\text{H}$  NMR of *syn-9* ( $\text{CDCl}_3$ , 500 MHz)

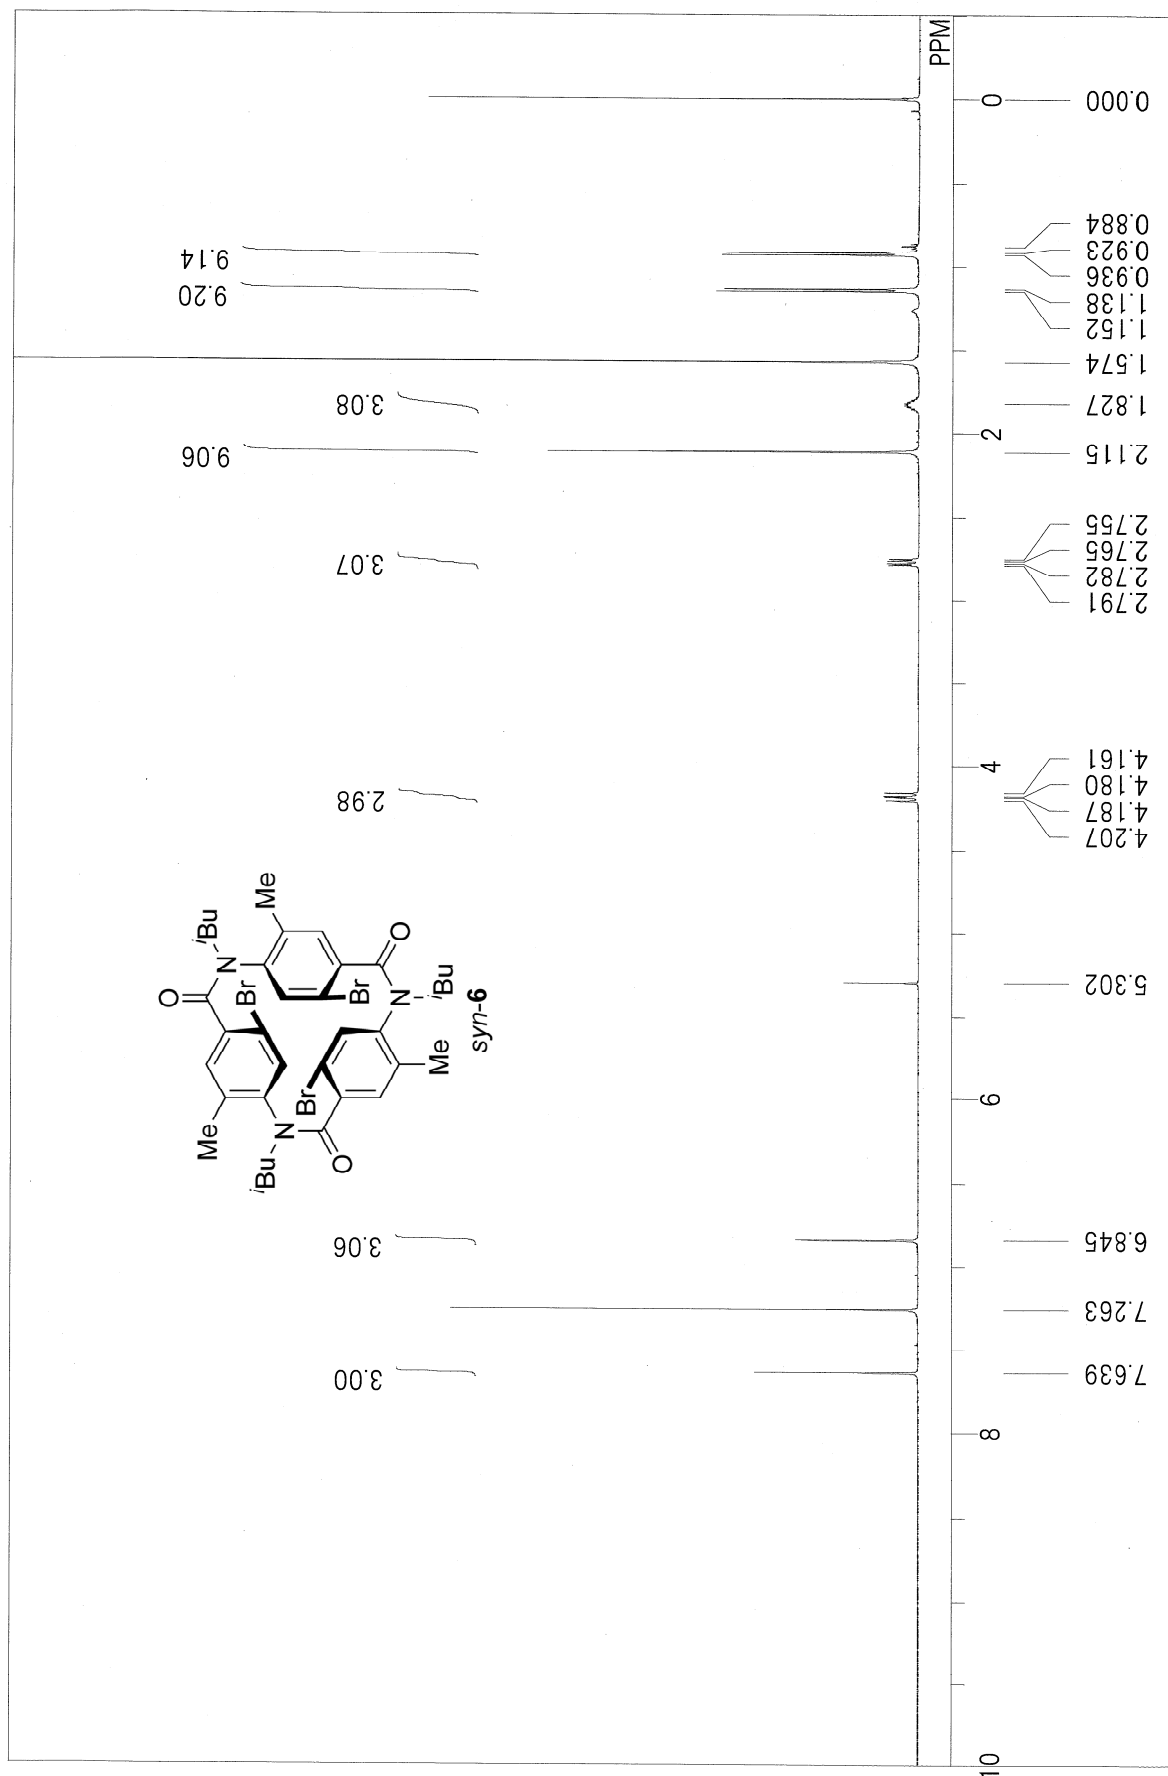

<sup>13</sup>C NMR of *syn-6* (CDCl<sub>3</sub>, 126 MHz)

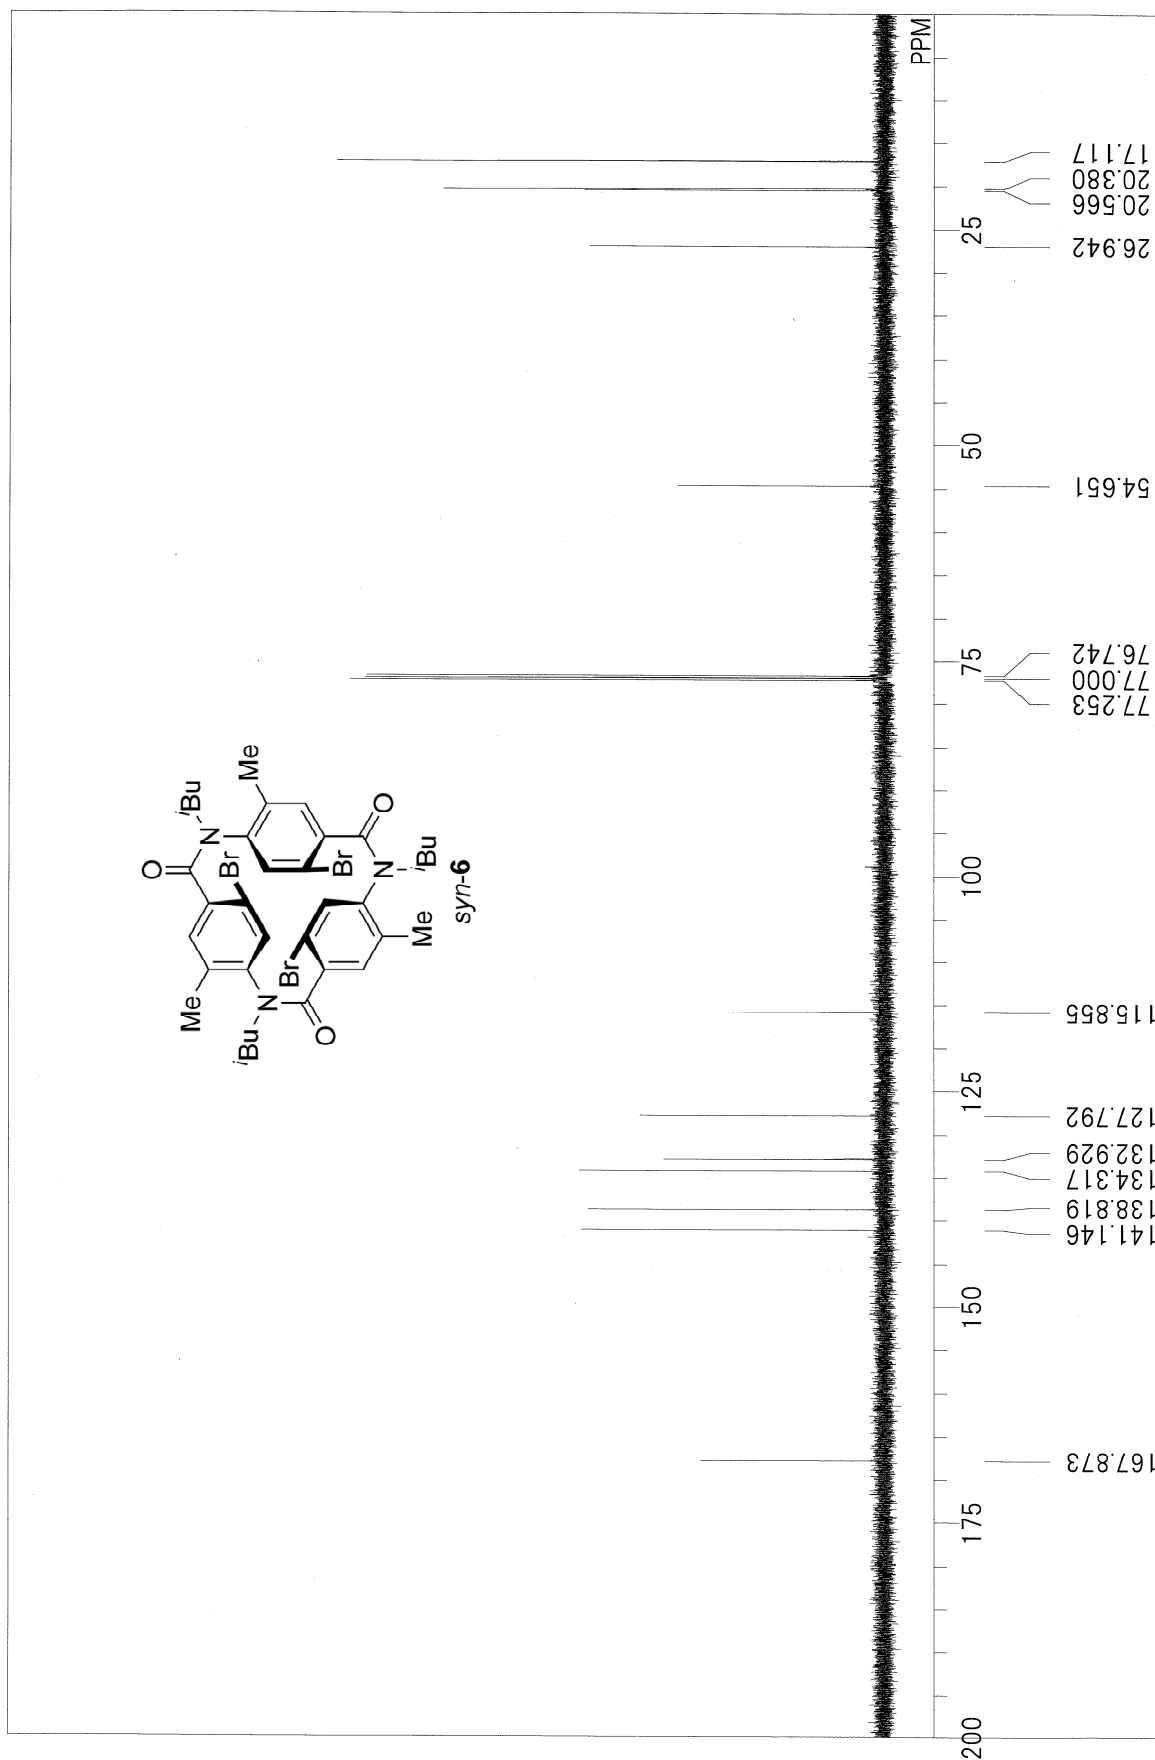



<sup>1</sup>H NMR of *anti*-6 (CDCl<sub>3</sub>, 500 MHz)

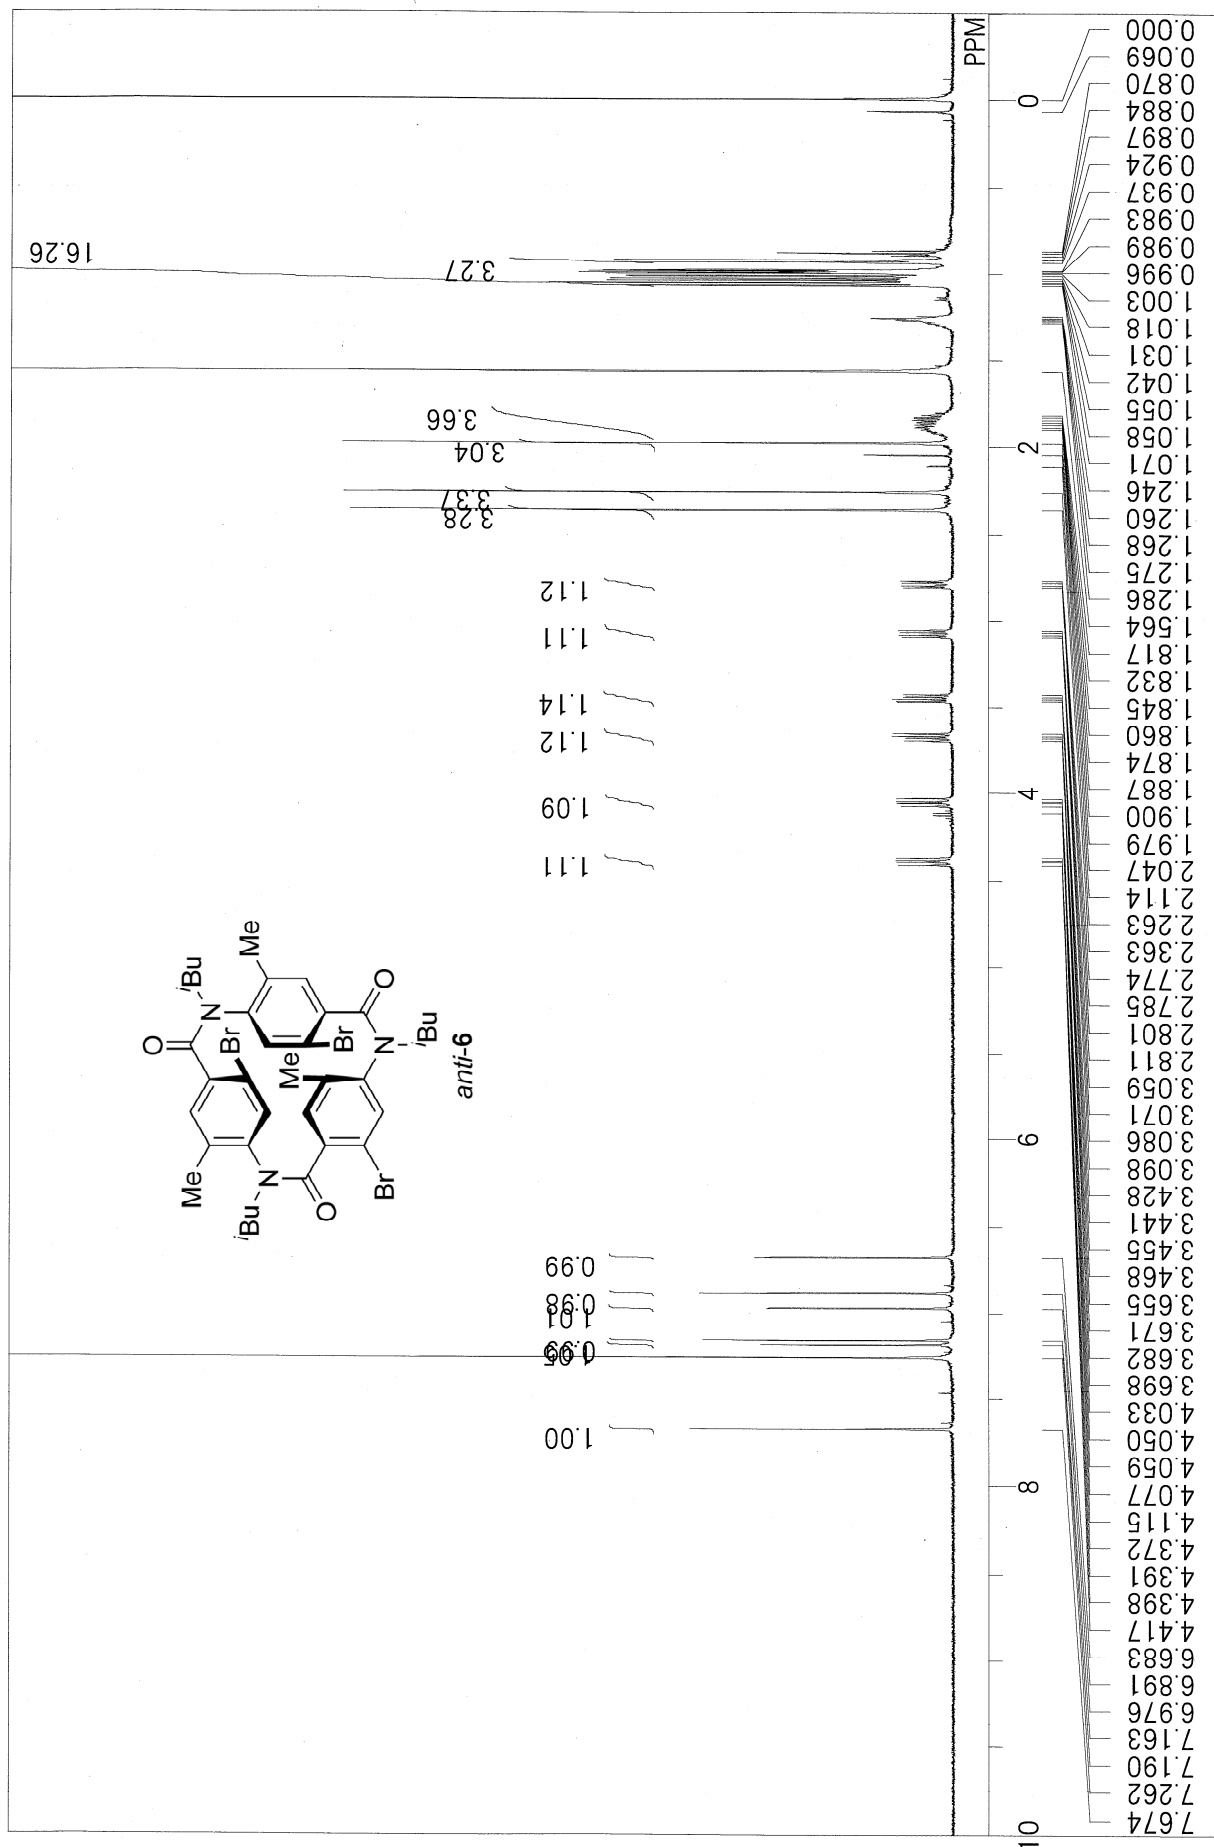

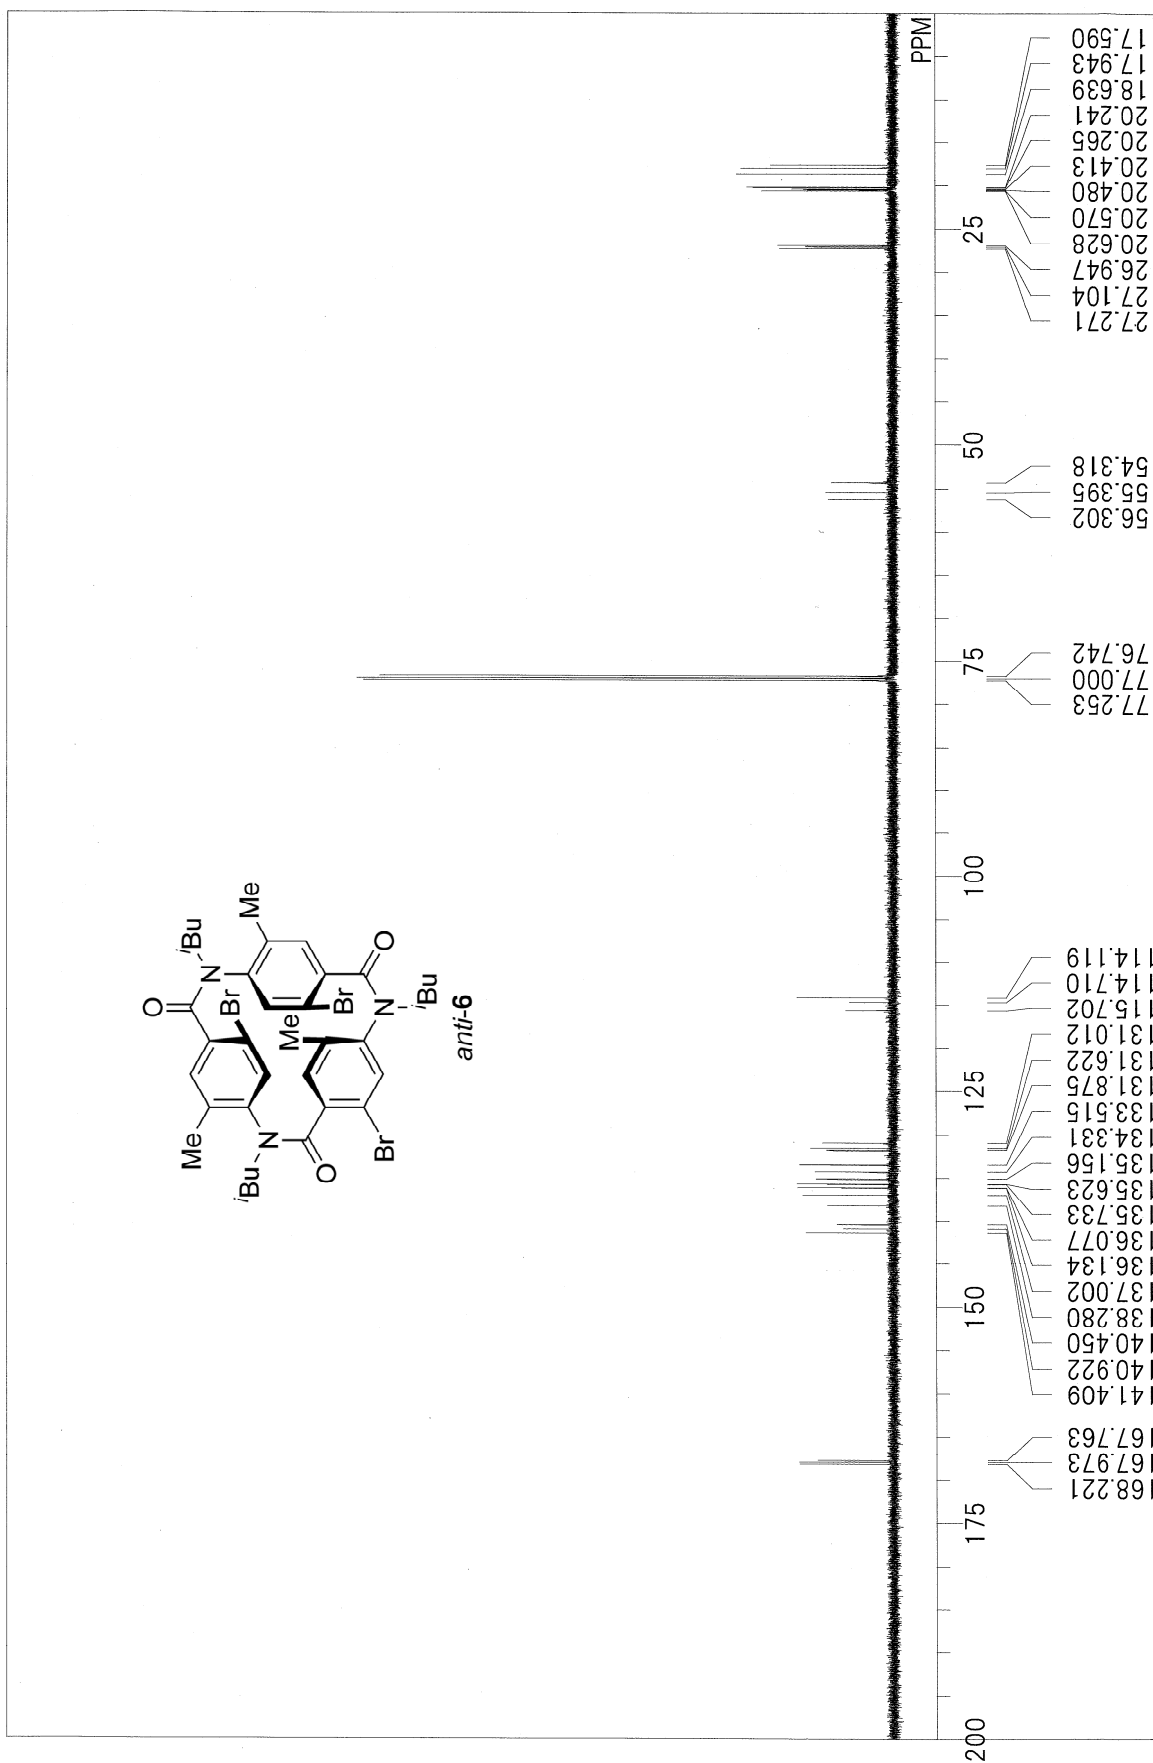

$^1\text{H}$  NMR of **3** ( $\text{CDCl}_3$ , 500 MHz)

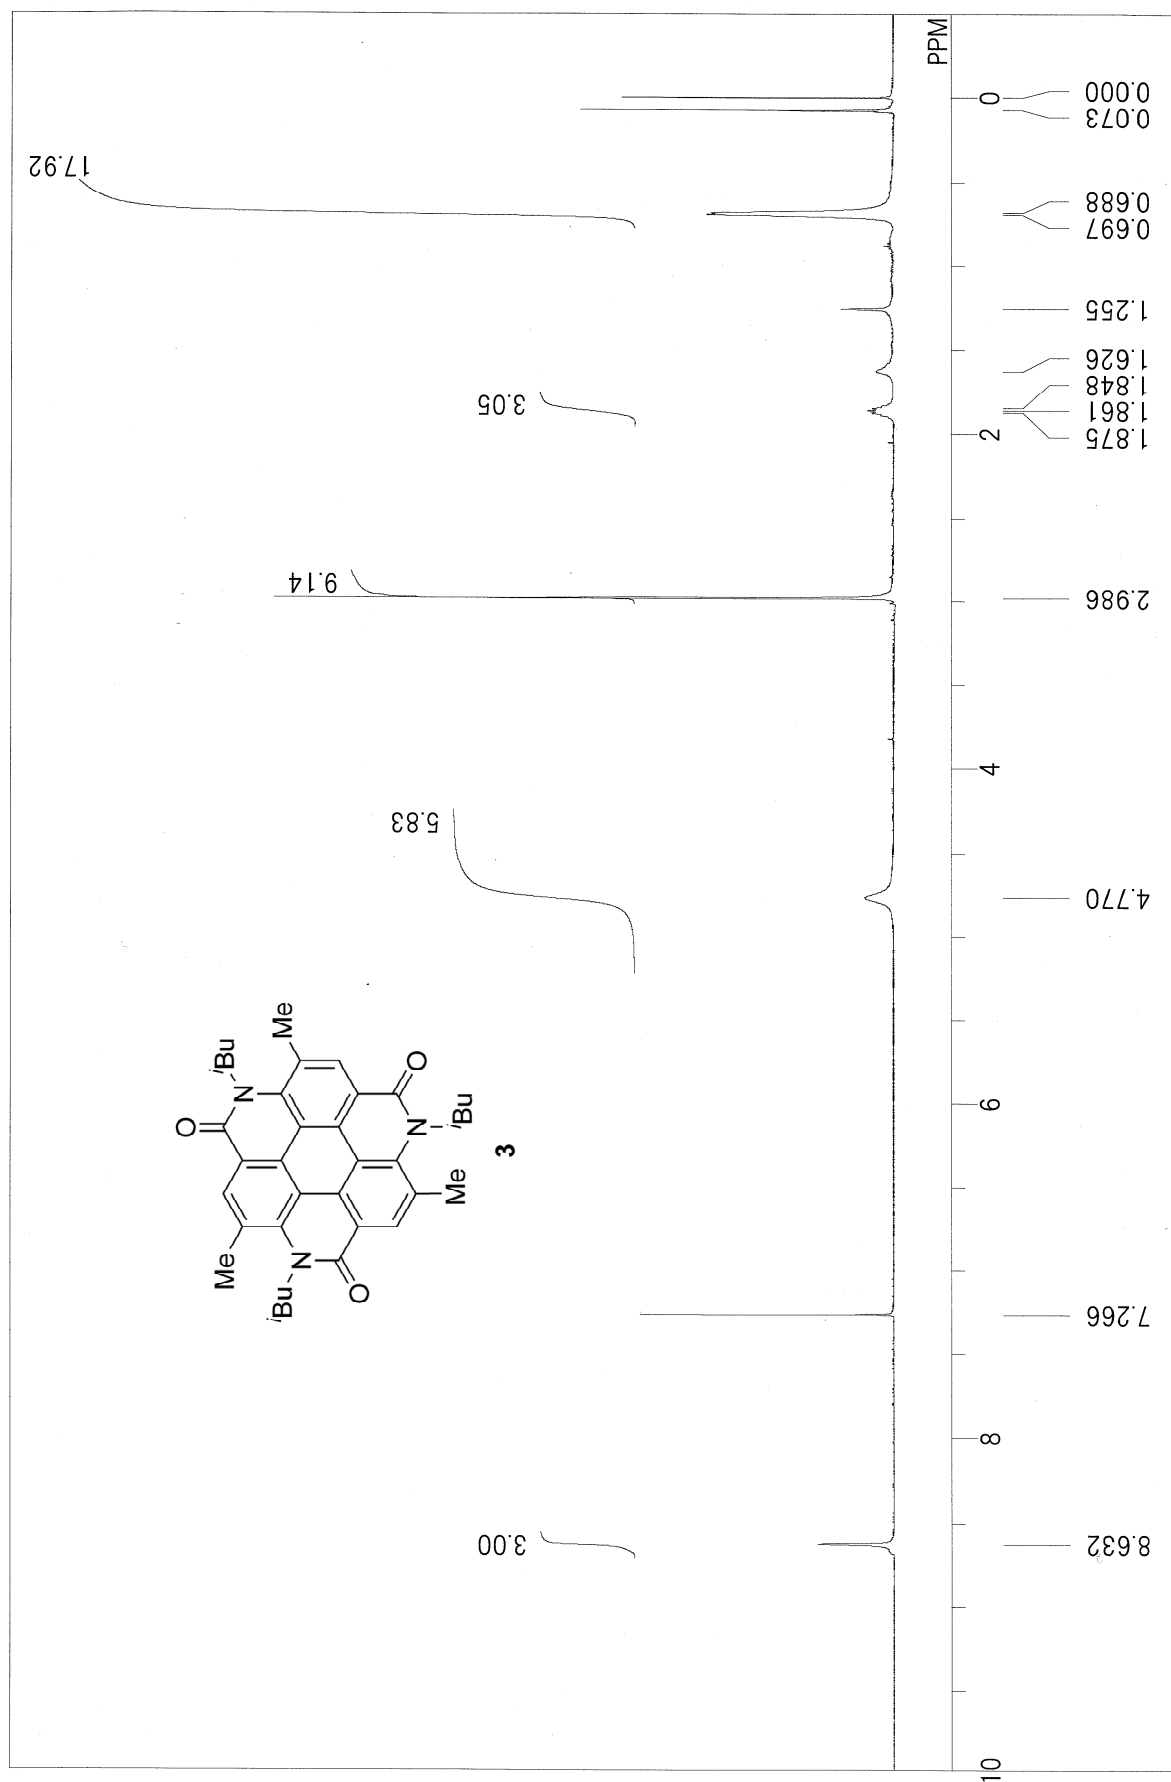

$^{13}\text{C}$  NMR of **3** ( $\text{CDCl}_3$ , 126 MHz)

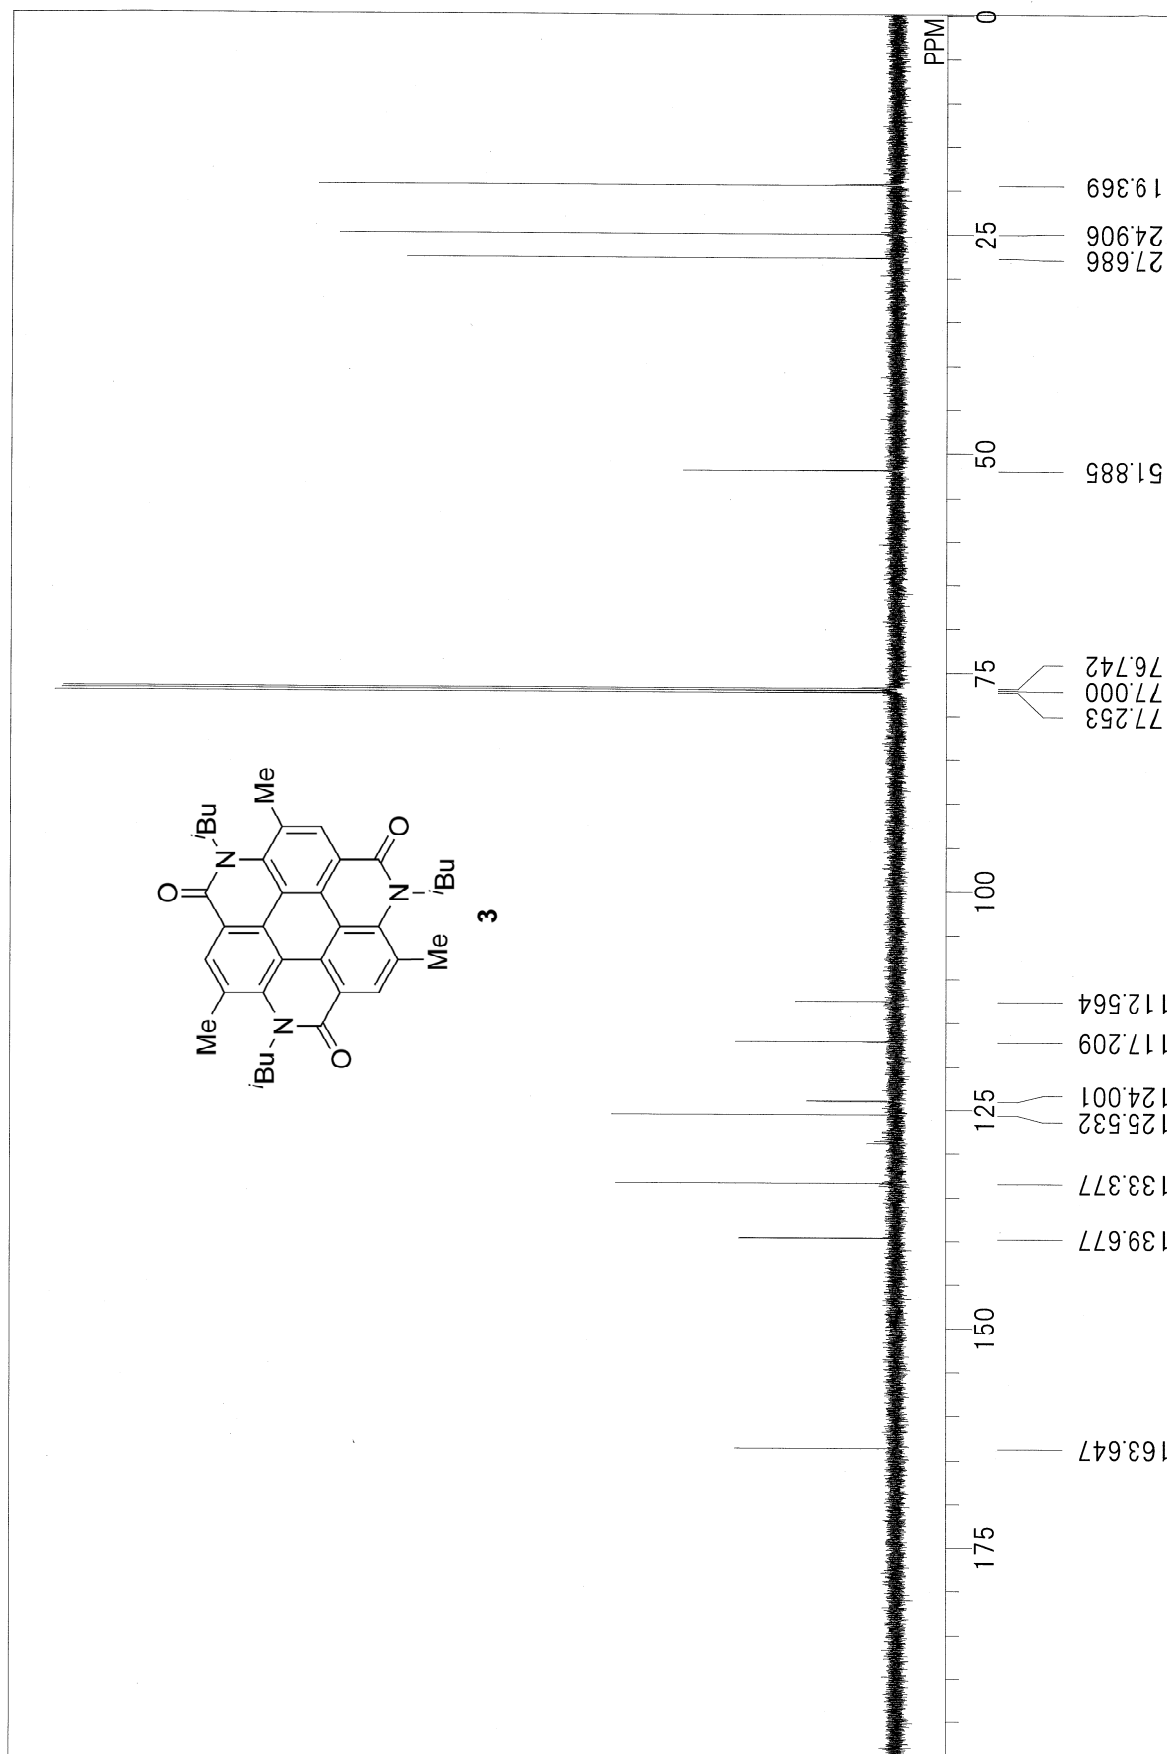

<sup>1</sup>H NMR of **13** (CDCl<sub>3</sub>, 500 MHz)

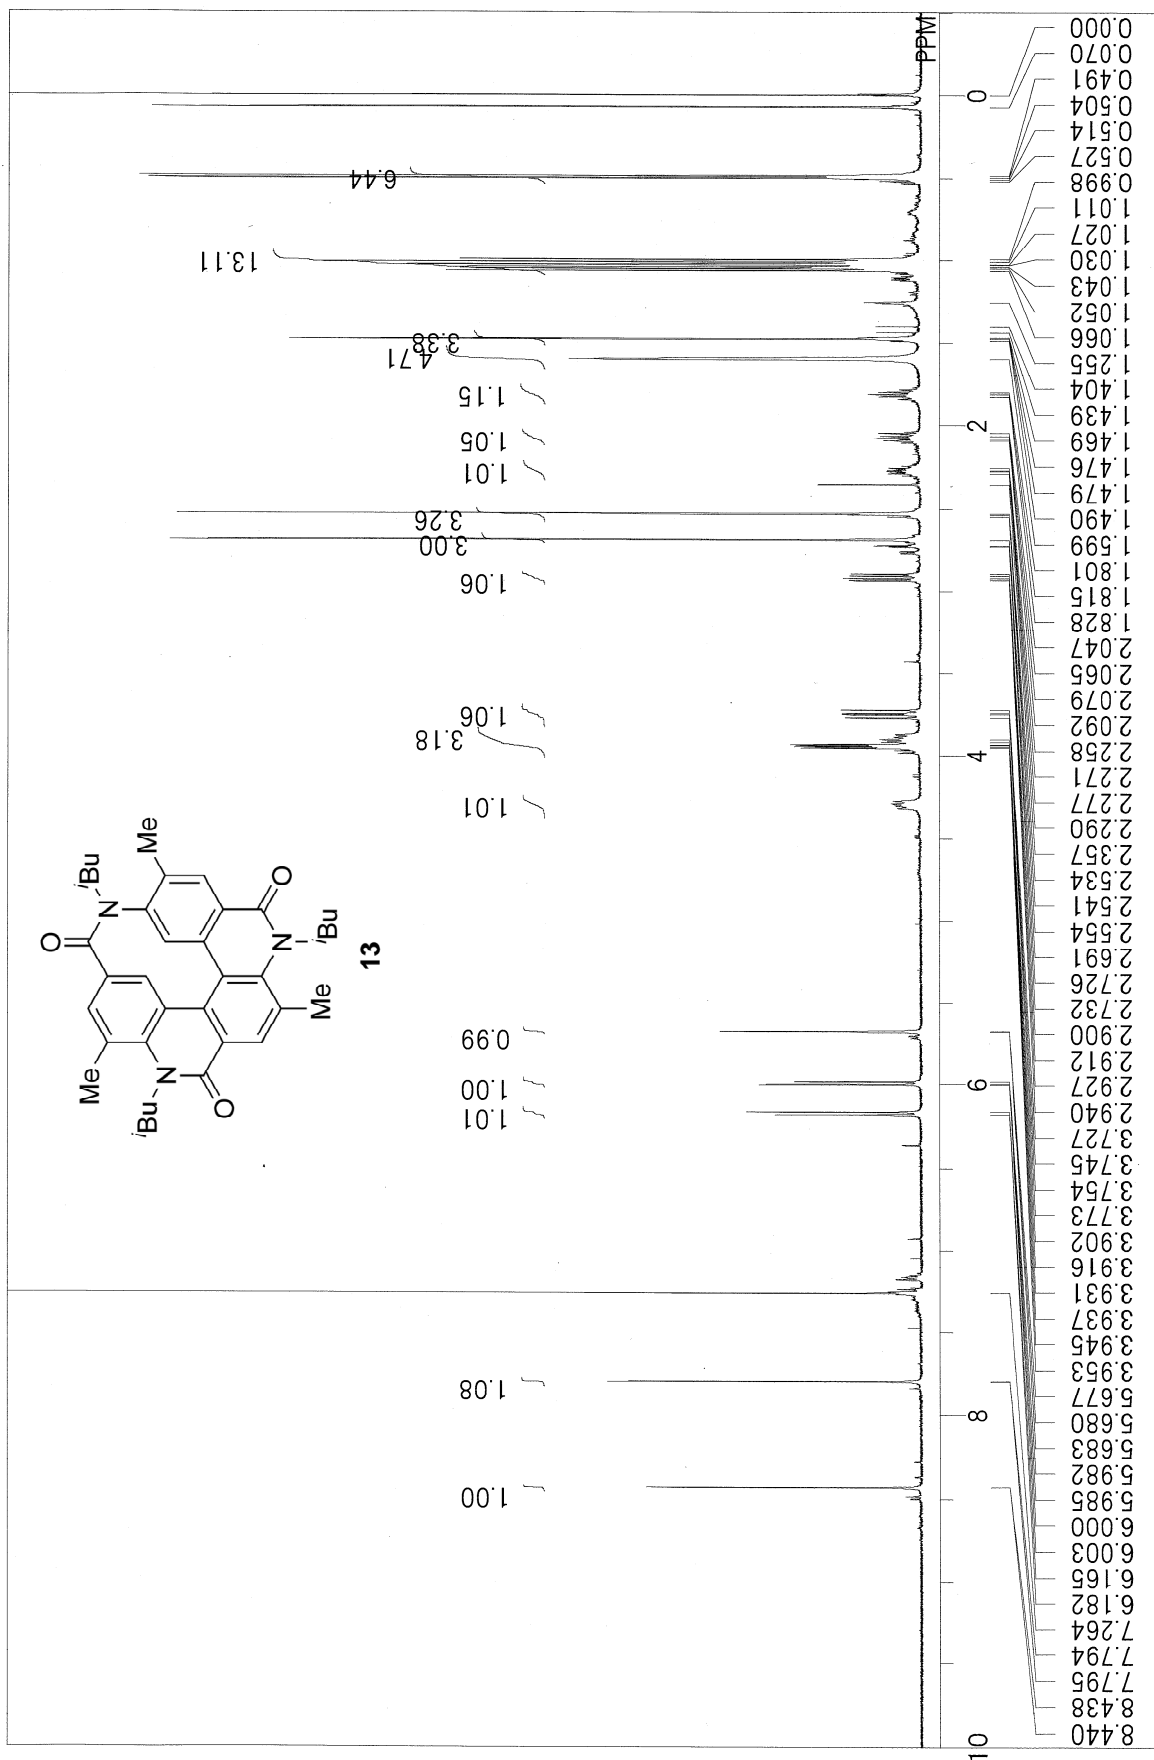

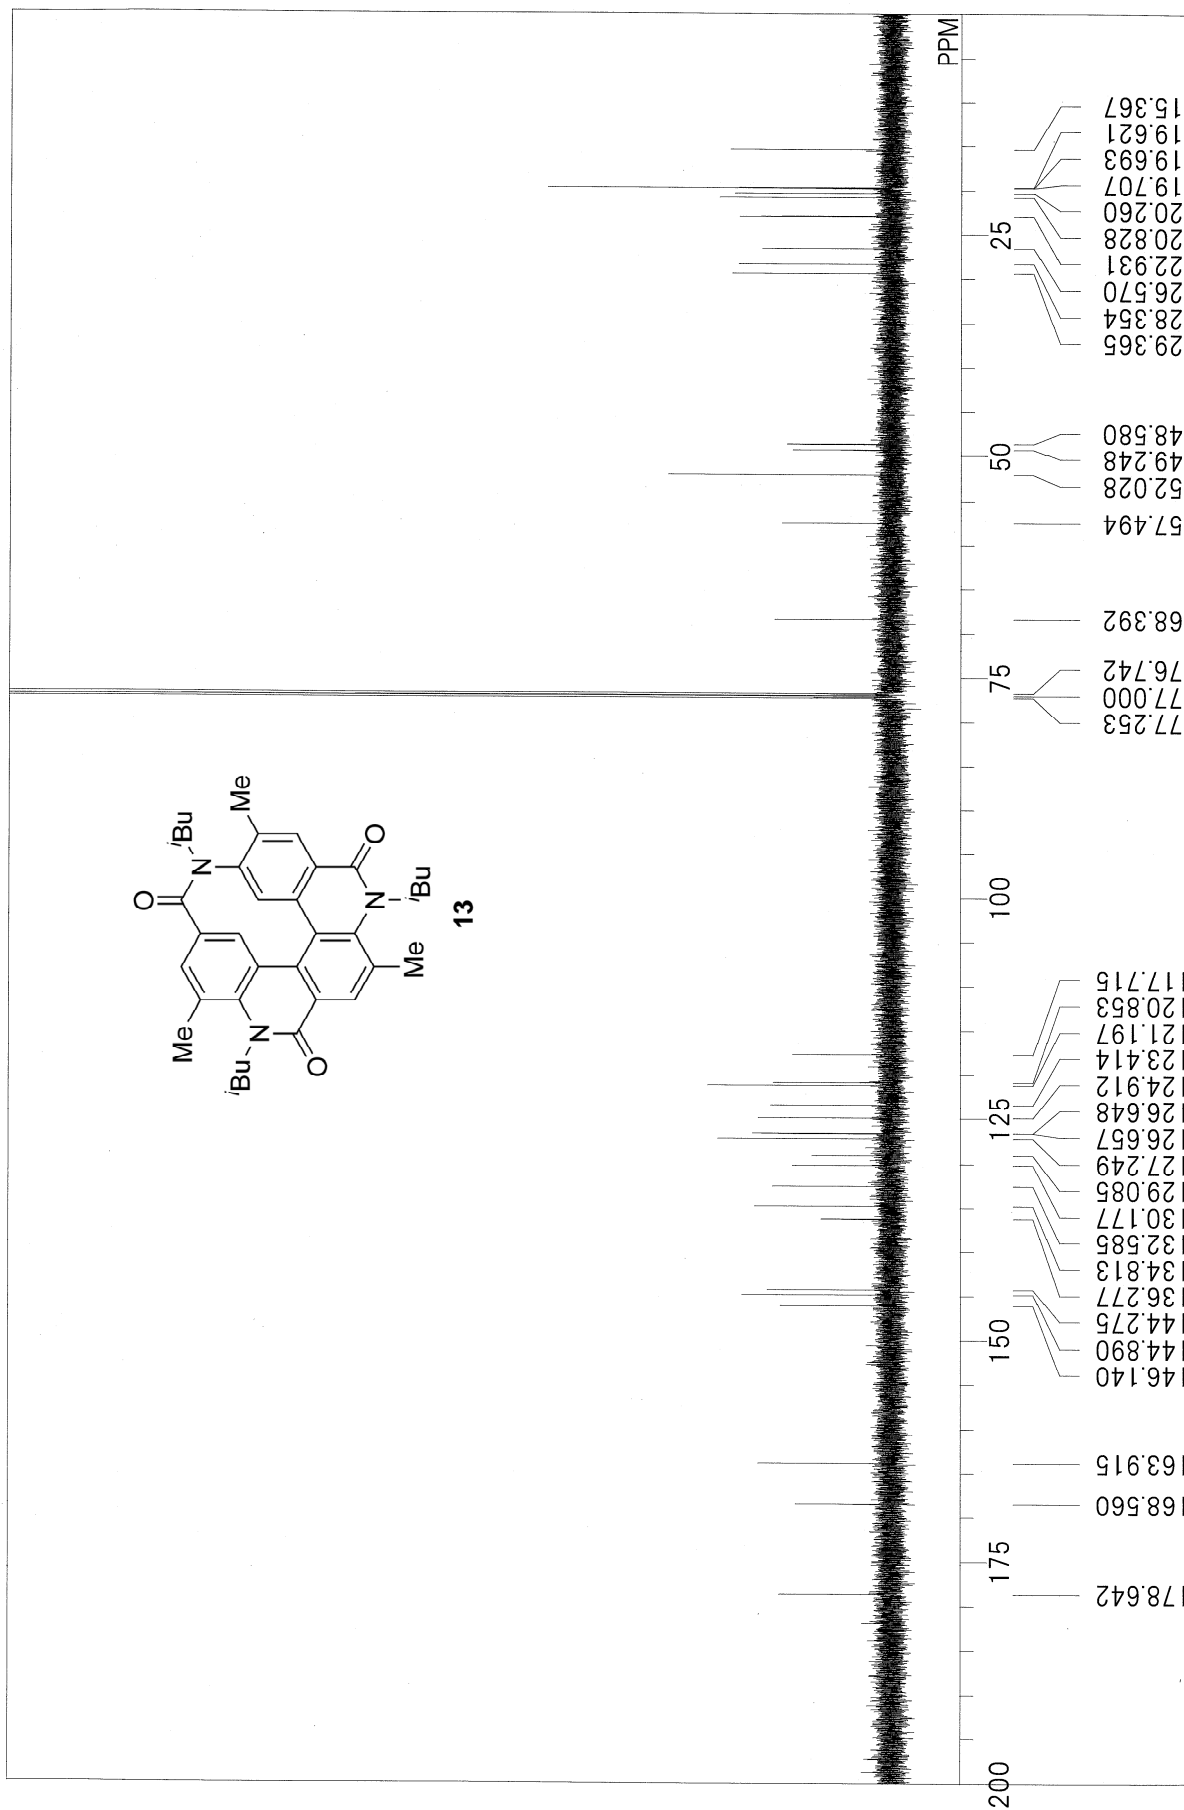

Supplement: d2ra04035b1.pdf [file d2ra04035b1.pdf]
